1 **A Pluripotent Developmental State Confers a Low Fidelity of Chromosome Segregation**

2

3 Chenhui Deng<sup>1,2</sup>, Amanda Ya<sup>1,2</sup>, Duane A. Compton<sup>1,2</sup>, and Kristina M. Godek<sup>1,2,\*</sup>

4

5 1. Department of Biochemistry and Cell Biology, Geisel School of Medicine at Dartmouth,  
6 Hanover, NH, United States of America.

7 2. Norris Cotton Cancer Center, Geisel School of Medicine at Dartmouth, Lebanon, NH, United  
8 States of America.

9

10

11

12

13

14

15

16

17

18

19

20 **\*Correspondence:**

21 Kristina M. Godek, Ph.D.

22 Geisel School of Medicine at Dartmouth

23 Department of Biochemistry and Cell Biology, HB7650

24 Phone: +1 (603) 646-5192

25 Lebanon, NH, 03756, USA

26 [Kristina.M.Godek@dartmouth.edu](mailto:Kristina.M.Godek@dartmouth.edu)

27 **Summary:**

28 Human pluripotent stem cells (hPSCs) frequently become aneuploid with abnormal  
29 chromosome numbers due to mitotic chromosome segregation errors during propagation in  
30 culture. Yet, we do not understand why hPSCs exhibit a low mitotic fidelity. Here we investigate  
31 the mechanisms responsible for mitotic errors in hPSCs and show that the primary cause is  
32 lagging chromosomes with improper merotelic chromosome microtubule attachments in  
33 anaphase. Accordingly, we can improve merotelic error correction and reduce lagging  
34 chromosome rates in hPSCs using small molecules that prolong mitotic duration or destabilize  
35 chromosome microtubule attachments providing chemical strategies to preserve genome  
36 stability. Strikingly, we also demonstrate that mitotic error rates correlate with developmental  
37 potential decreasing upon differentiation and loss of pluripotency and conversely increasing  
38 after reprogramming to a pluripotent state. Thus, chromosome segregation fidelity is inherently  
39 low in hPSCs and depends on developmental state in normal human cells.

40

41 **Keywords:** Aneuploidy, mitosis, chromosome segregation, human pluripotent stem cells,  
42 preimplantation, chromosomal instability, developmental potential

43 **Introduction:**

44 Human pluripotent stem cells (hPSCs), including human embryonic stem cells (hESCs)  
45 and induced pluripotent stem cells (iPSCs), have the ability to differentiate into cells of all three  
46 embryonic germ layers and hence hold great promise for modeling and treating human diseases  
47 and conditions. However, during propagation in culture, hPSCs often become aneuploid with  
48 abnormal numbers of chromosomes (Baker et al., 2007; Mayshar et al., 2010; Taapken et al.,  
49 2011). Aneuploidy in hPSCs is attributed to culture adaptation that selects for abnormal, stable  
50 aneuploid karyotypes which outcompete diploid hPSCs limiting potential therapeutic  
51 applications (Baker et al., 2007; Keller and Spits, 2021; Mayshar et al., 2010; Price et al., 2021;  
52 Taapken et al., 2011).

53 Although culture adaptation explains how reoccurring constitutive aneuploidies become  
54 dominant in cultures of hPSCs, it does not explain how or why mitotic chromosome segregation  
55 errors occur in hPSCs generating an aneuploid genome. Perturbed DNA replication dynamics,  
56 DNA damage and defects in chromosome condensation that typically cause structural  
57 aneuploidies involving copy number alterations to chromosomal segments are linked to mitotic  
58 defects in hPSCs (Burrell et al., 2013; Halliwell et al., 2020; Lamm et al., 2016). However, whole  
59 chromosome aneuploidies resulting in the gain or loss of whole chromosomes are also  
60 prevalent in hPSCs (Baker et al., 2007; Mayshar et al., 2010; Taapken et al., 2011), but we do  
61 not know the mitotic pathways responsible for whole chromosome segregation errors in hPSCs.

62 Similarly, during early human embryogenesis aneuploidy is prevalent in totipotent and  
63 pluripotent embryonic cells with aneuploidy rates ranging between 25-90% for *in vitro*  
64 *fertilization* (IVF) preimplantation human embryos (Baart et al., 2006; Fragouli et al., 2008, 2013;  
65 McCoy et al., 2015; Mertzaniidou et al., 2013; Vanneste et al., 2009) making aneuploidy the  
66 leading cause of miscarriages and birth defects in humans (Hassold and Hunt, 2001; Menasha  
67 et al., 2005; Orr et al., 2015). The high incidence of aneuploidy occurs irrespective of maternal  
68 age, infertility or embryo quality (Mertzaniidou et al., 2013; Popovic et al., 2019; Vanneste et al.,

69 2009). Due to obvious legal and ethical restrictions, aneuploidy rates in naturally conceived  
70 human embryos are unknown but are thought to correspond to aneuploidy rates in IVF  
71 preimplantation embryos accounting for a low human fecundity rate with only ~30% of  
72 conceptions resulting in live births (Macklon et al., 2002; McCoy, 2017).

73 Surprisingly, like hPSCs, whole chromosome abnormalities caused by mitotic errors are  
74 more frequent than meiotic errors and structural aneuploidies in IVF preimplantation embryos  
75 (McCoy et al., 2015; Vanneste et al., 2009). This raises the intriguing possibility that mitotic  
76 errors and aneuploidy in hPSCs are not solely an artifact of growth in culture but rather are  
77 intrinsic characteristics of pluripotent cells. Yet, like hPSCs, we also do not know the underlying  
78 mechanisms causing the persistent and high rate of mitotic chromosome segregation errors in  
79 preimplantation embryonic cells. To investigate the mechanisms responsible for mitotic  
80 chromosome segregation errors in pluripotent cells, we categorize and quantify mitotic errors in  
81 hPSCs using fixed and time-lapse live-cell fluorescence microscopy. Furthermore, we use small  
82 molecules and manipulate development potential to test the influence of mitotic duration and  
83 chromosome microtubule attachment stability and developmental state, respectively, on  
84 chromosome segregation fidelity in hPSCs.

85

## 86 **Results:**

### 87 **Lagging chromosomes, caused by merotelic microtubule attachments, are responsible** 88 **for elevated mitotic error rates in hPSCs**

89 To determine the mechanisms causing mitotic chromosome segregation errors in  
90 hPSCs, we categorized the types of anaphase errors observed and compared anaphase error  
91 rates between pluripotent H1 and H9 human embryonic stem cells (hESCs) derived from the  
92 inner cell mass of human blastocysts (Thomson et al., 1998) and normal, primary somatic BJ  
93 fibroblasts (Figures 1A-B). Lagging chromosomes, unaligned chromosomes, and multipolar  
94 anaphases cause whole chromosome aneuploidy while acentric DNA fragments and

95 chromosome bridges lead to structural aneuploidy (Figures 1A-B) (Burrell et al., 2013; Orr et al.,  
96 2015; Thompson and Compton, 2008). We also included a combination category for cells that  
97 exhibited multiple types of anaphase errors (Figures 1A-B).

98 In somatic BJ fibroblasts, lagging chromosomes were the most frequent anaphase error;  
99 however, the rate was less than 5% (Figure 1B). In agreement, mitotic error and aneuploidy  
100 rates are less than 5% in other normal human somatic cells and tissues (Cimini et al., 1999;  
101 Knouse et al., 2014; Thompson and Compton, 2008). Lagging chromosomes were also the  
102 most frequent anaphase error in H1 and H9 hESCs; however, the rate was significantly higher,  
103 more than double (>10% in H1 and H9 hESCs), compared to somatic BJ fibroblasts (Figure 1B).  
104 Furthermore, H1 hESCs had a significantly higher frequency of acentric DNA fragments  
105 compared to somatic BJ fibroblasts. Though, it was less than half the frequency of lagging  
106 chromosomes in H1 hESCs, and there was not a similar trend in H9 hESCs (Figure 1B). In  
107 parallel samples, we quantified that more than 95% of the H1 or the H9 hESC population  
108 expressed the pluripotency transcription factors OCT4 or NANOG demonstrating that  
109 spontaneously differentiated cells did not account for the elevated error rates (Figures S1A-B).

110 As lagging chromosomes were the most frequent anaphase error in hESCs (Figure 1B),  
111 we sought to determine the causes of these. Using a calcium stable microtubule assay (Warren  
112 et al., 2020), we examined chromosome microtubule attachment orientations in hESCs because  
113 in other mammalian and human cancer cells, lagging chromosomes are caused by the  
114 persistence of improper merotelic chromosome microtubule attachments (also referred to as  
115 kinetochore microtubule or k-MT) in anaphase with a chromosome simultaneously attached to  
116 microtubules from both spindle poles (Cimini et al., 2001; Thompson and Compton, 2008;  
117 Thompson et al., 2010). In metaphase, H1 and H9 hESCs had correct bioriented attachments  
118 with sister chromatids attached to microtubules from opposite spindle poles and incorrect  
119 merotelic attachments with a single chromatid simultaneously attached to microtubules from  
120 both spindle poles (Figures 1C and S1C). Notably, 73% of the H1 and 50% of the H9 lagging

121 chromosomes in anaphase had merotelic attachments (Figures 1C and S1C). We could not  
122 reliably conclude the attachment orientations of the remaining lagging chromosomes because in  
123 some instances, we observed a lagging chromosome attached to microtubules extending in  
124 opposite directions, but we could not track the microtubules back to the spindle poles. Also, the  
125 absence of a merotelic attachment may reflect the calcium sensitivity of the attachment rather  
126 than an alternative attachment orientation. Because of these limitations, our results likely  
127 underestimate the proportion of lagging chromosomes with merotelic attachments in hESCs.

128 HESCs often acquire stable chromosome abnormalities during culturing (Baker et al.,  
129 2007; Mayshar et al., 2010; Taapken et al., 2011) that, when coupled with the increased  
130 genomic instability caused by an aneuploid genome (Passerini et al., 2016; Sheltzer et al.,  
131 2011), suggests the possibility that only aneuploid hESCs exhibit erroneous lagging  
132 chromosomes with merotelic attachments. To address this possibility, prior to performing the  
133 calcium stable microtubule assay, we karyotyped both H1 and H9 hESC populations to monitor  
134 genomic stability since it is not feasible to simultaneously measure anaphase errors and  
135 determine the karyotype of cells. In both the H1 and the H9 populations, 20 of 20 cells scored  
136 were diploid. From this data, we can infer that less than 14% of cells in either population are  
137 aneuploid with 95% confidence (Baker et al., 2016) arguing that at least some H1 and H9  
138 hESCs exhibiting lagging chromosomes with merotelic attachments are diploid.

139 To further validate our findings, we performed time-lapse live-cell fluorescence  
140 microscopy using normal, immortalized somatic RPE-1 H2B-GFP epithelial cells, H1 H2B-GFP  
141 hESCs (Calder et al., 2013), and AICS-061 human induced pluripotent stem cells (hiPSCs) that  
142 were derived from parental WTC-11 hiPSCs reprogrammed from dermal fibroblasts (Hayashi et  
143 al., 2016). Somatic RPE-1 H2B-GFP cells and H1 H2B-GFP hESCs exogenously express  
144 histone H2B tagged with GFP while AICS-061 hiPSCs express endogenous H2B monoallelically  
145 tagged with mEGFP allowing us to quantify anaphase error rates (Figures 1D-E and Videos S1-  
146 3). Similar to our previous results, lagging chromosomes were the most frequent anaphase

147 error, and the rate was significantly elevated in H1 H2B-GFP hESCs (22% Laminin-521 and  
148 21% Matrigel) and AICS-061 hiPSCs (21%) compared to somatic RPE-1 H2B-GFP cells (7%)  
149 (Figure 1E and Video S2). Although we cannot definitively distinguish acentric DNA fragments  
150 from lagging chromosomes in these experiments, we classified these errors as lagging  
151 chromosomes based upon the low incidence of acentrics in all our other analyses (Figures 1B  
152 and S3B, S4C and S4E). Thus, a shared phenotype of pluripotent cells is a high mitotic error  
153 rate compared to somatic cells with lagging chromosomes being the most frequent error.  
154 Furthermore, the lagging chromosome rate was significantly elevated in H1 H2B-GFP hESCs  
155 compared to somatic RPE-1 H2B-GFP cells irrespective of whether we dissociated and seeded  
156 H1 H2B-GFP hESCs as single cells without initial cell-cell contacts on a Laminin-521 substrate  
157 or as aggregates that maintain cell-cell contacts on a Matrigel substrate (Figure 1E). Our results  
158 combined with the high incidence of mitotic errors in IVF preimplantation embryos (McCoy et al.,  
159 2015; Vanneste et al., 2009), which maintain their 3D structure, argue that the disruption of  
160 tissue structure is unlikely to artificially increase mitotic error rates for hESCs growing in culture  
161 in contrast to recent findings in somatic epithelial tissues (Knouse et al., 2018).

162 Chromosome bridges were the second most frequent error, but there was not a  
163 significant difference in the chromosome bridge rate between somatic RPE-1 cells and hPSCs  
164 (Figure 1E). Also, we rarely observed multipolar anaphases or unaligned chromosomes (1/258  
165 each in AICS-061 hiPSCs) (Figure 1E). The low incidence of unaligned chromosomes in hPSCs  
166 (Figures 1B and E) indicates the spindle assembly checkpoint (SAC) is functionally preventing  
167 anaphase onset until microtubules attach to chromosomes, which facilitates chromosome  
168 alignment (Musacchio and Salmon, 2007). In further support, we observed an H1 H2B-GFP  
169 hESC that delayed anaphase onset for more than 2 hrs due to a chromosome that failed to align  
170 (Figure S1D and Video S4), and hESCs arrest in mitosis in the presence of the microtubule  
171 depolymerizing drug nocodazole (Becker et al., 2006; Zhang et al., 2019). Thus, SAC signaling  
172 is functional and responsive to unattached chromosomes in hPSCs. In contrast, mouse morulae

173 stage embryonic cells exhibit a high frequency of unaligned chromosomes indicative of  
174 insufficient SAC signaling (Vázquez-Diez et al., 2019). Collectively, our results agree with  
175 previous studies that quantified total mitotic error rates between 15-20% in hPSCs (Halliwell et  
176 al., 2020; Lamm et al., 2016; Milagre et al., 2020; Peterson et al., 2011; Taapken et al., 2011;  
177 Zhang et al., 2019), but importantly we extend these observations and demonstrate that lagging  
178 chromosomes in anaphase, caused by improper merotelic attachments, are the most frequent  
179 mitotic error in hPSCs and that lagging chromosome rates are significantly elevated in hPSCs  
180 compared to somatic cells.

181

### 182 **Prolonging mitotic duration decreases mitotic error rates in hPSCs**

183 Chromosome missegregation rates are proportional to lagging chromosome rates  
184 because lagging chromosomes with merotelic attachments have an increased likelihood of  
185 segregating to the incorrect daughter cell producing two aneuploid progeny (Thompson and  
186 Compton, 2008). Therefore, we investigated why lagging chromosomes with merotelic  
187 attachments are more prevalent in hPSCs compared to somatic cells and on testing strategies  
188 to reduce merotelic attachments and decrease lagging chromosome rates in hPSCs, particularly  
189 because culture adaptation that selects for hPSCs with abnormal, stable aneuploid karyotypes  
190 must initiate with mitotic errors to generate the aneuploid substrates for selection (Baker et al.,  
191 2007; Taapken et al., 2011).

192 Improper merotelic attachments are not detected by the SAC (Cimini et al., 2001) but  
193 instead a network of kinases (Cimini et al., 2006; Godek et al., 2014; Salimian et al., 2011) and  
194 microtubule depolymerases (Bakhoum et al., 2008; Godek et al., 2014) converts improper  
195 merotelic attachments to correct bioriented attachments by facilitating iterative cycles of  
196 microtubule detachment and reattachment prior to anaphase onset (Godek et al., 2014). Thus,  
197 one parameter that influences merotelic error correction efficiency is mitotic duration with a  
198 longer mitotic duration allowing for more cycles of microtubule detachment and reattachment



199 decreasing the frequency of errors (Figure 2A, note: error correction rate does not change)  
200 (Cimini et al., 2003; Sansregret et al., 2017) and conversely a shorter mitotic duration increasing  
201 errors. Accordingly, if mitotic duration is insufficient for robust merotelic error correction in  
202 hPSCs this will cause an elevated frequency of lagging chromosomes. A prediction of this  
203 hypothesis is that mitotic duration is shorter in hPSCs than somatic cells.

204 To test this hypothesis, we measured mitotic duration from nuclear envelope breakdown  
205 (NEB) to anaphase onset (AO) in the H1 H2B-GFP hESCs, AICS-061 hiPSCs, and somatic  
206 RPE-1 H2B-GFP cells that we quantified anaphase error rates in (Figure 1E). In both H1 H2B-  
207 GFP hESCs and AICS-061 hiPSCs mitotic duration from NEB to AO, including prometaphase  
208 (NEB to metaphase) and metaphase (metaphase to AO), was significantly increased compared  
209 to somatic RPE-1 cells demonstrating that the elevated lagging chromosome rates in hPSCs  
210 are not caused by an abbreviated mitotic duration compared to somatic cells (Figure S1E). In  
211 further support, there was no significant difference in mitotic duration, including prometaphase  
212 or metaphase, between hPSCs that went through a normal mitosis or an aberrant mitosis  
213 (Figure S1F) underscoring that an abbreviated mitosis does not account for errors. These  
214 results suggest that other mechanisms are responsible for the elevated frequency of lagging  
215 chromosomes in hPSCs compared to somatic cells (see next section).

216 Nevertheless, we tested if prolonging mitosis would effectively reduce lagging  
217 chromosome rates in hPSCs by allowing for more cycles of microtubule release and  
218 reattachment prior to anaphase onset (Figure 2A). To test this strategy, we used the small  
219 molecule proTAME to delay mitotic progression. ProTAME inhibits the anaphase promoting  
220 complex/cyclosome (APC/C) E3 ubiquitin ligase whose activity is required for mitotic exit and  
221 whose partial inhibition increases mitotic duration in human somatic and cancer cells (Zeng et  
222 al., 2010). As a positive control, we reproduced previous results demonstrating that prolonging  
223 mitosis with proTAME reduces the frequency of mitotic errors, including lagging chromosomes,  
224 in somatic RPE-1 cells when error rates are artificially elevated (Figures S2A-C) (Sansregret et

225 al., 2017). For our experiments in hPSCs, we added proTAME to H1 H2B-GFP hESCs or AICS-  
226 061 hiPSCs immediately prior to starting time-lapse live-cell imaging and imaged cells for 7 hrs  
227 in the presence of proTAME. Also, in parallel samples, we quantified that more than 95% of the  
228 H1 H2B-GFP or the AICS-061 hPSCs expressed OCT4 or NANOG prior to proTAME treatment,  
229 indicating that spontaneously differentiated cells in the populations were unlikely to influence the  
230 outcomes (Figures S2G and J).

231 In both H1 H2B-GFP hESCs and AICS-061 hiPSCs, mitotic duration significantly  
232 increased proportionally with proTAME concentration (Figures 2B-C and S2H). Importantly, as  
233 mitotic duration increased, the incidence of lagging chromosomes significantly decreased for H1  
234 H2B-GFP hESCs (Figures 2C-D). The chromosome bridge and total anaphase error rates also  
235 significantly decreased with proTAME treatment (Figures 2C-D and S2E). Chromosome bridges  
236 are a consequence of under-replicated DNA regions or unresolved aberrant DNA structures that  
237 persist into mitosis and prolonging mitosis may also facilitate the correction of these errors  
238 (Fragkos and Naim, 2017). Surprisingly, the frequency of lagging chromosomes did not  
239 significantly decrease in AICS-061 hiPSCs (Figure S2I) despite an increased mitotic duration  
240 comparable to H1 H2B-GFP hESCs (Figures 2C and S2H). Consequently, we checked the  
241 genomic stability of AICS-061 hiPSCs during these experiments reasoning that aneuploid cells  
242 could be insensitive to this approach. There was a clonal abnormal karyotype, including a  
243 terminal deletion of the long arm of chromosome 18, but it was present at a low frequency in the  
244 population (10%, 2/20) and thus is unlikely to be the reason for the different response. We  
245 speculate that in AICS-061 hiPSCs other parameters have a greater influence on merotelic error  
246 correction. Also, we note that the lagging chromosome rate (~20%) is approximately double the  
247 frequency of aneuploid cells in the population indicating that aneuploid cells do not solely  
248 account for the error rate.

249 The reduction in the lagging chromosome rate in H1 H2B-GFP hESCs could be a  
250 consequence of prolonging prometaphase, metaphase or both. Interestingly, metaphase was

251 selectively lengthened proportional to proTAME concentration (Figure S2D) in H1 H2B-GFP  
252 hESCs, similar to somatic RPE-1 H2B-GFP cells (Figure S2A), demonstrating that, at least for  
253 some cells, metaphase duration can be a rate-limiting step in merotelic error correction. In  
254 further support, there was a significant decrease in metaphase duration for H1 H2B-GFP hESCs  
255 that went through mitosis with a lagging chromosome vs. a normal mitosis in the 20  $\mu$ M  
256 proTAME treatment group (Figure S2F). However, this trend did not occur in the 6  $\mu$ M proTAME  
257 treatment group (Figure S2F) revealing that error correction is not exclusively limited by  
258 metaphase duration. Combined, our results demonstrate that the elevated frequency of lagging  
259 chromosomes in hPSCs compared to somatic cells is not caused by an abbreviated mitosis;  
260 however, delaying mitotic progression, and metaphase specifically, is an effective strategy to  
261 improve merotelic error correction and reduce the lagging chromosome rate in hPSCs, albeit  
262 with the application limited to select hPSC lines.

263

#### 264 **Decreasing microtubule attachment stability reduces mitotic errors in hPSCs**

265 The iterative cycles of microtubule detachment and reattachment required for merotelic  
266 error correction also dictate that the error correction rate depends on chromosome microtubule  
267 attachment turnover with hyperstable attachments (i.e. low turnover) inhibiting the release of  
268 incorrect merotelic attachments (Bakhoun et al., 2009; Godek et al., 2014). Hence, hyperstable  
269 chromosome microtubule attachments in hPSCs relative to somatic cells is an alternative  
270 hypothesis explaining the elevated incidence of lagging chromosomes in hPSCs. This predicts  
271 that decreasing microtubule attachment stability (i.e. increasing turnover) will reduce lagging  
272 chromosome rates in hPSCs (Figure 3A, note: mitotic duration does not change).

273 To test this prediction, we used the small molecule UMK57, an agonist of the  
274 microtubule depolymerase mitotic centromere-associated kinesin (MCAK or KIF2C), to  
275 decrease microtubule attachment stability in hPSCs. In human cancer cells with hyperstable

276 attachments, short-term UMK57 treatment potentiates MCAK activity destabilizing microtubule  
277 attachments in metaphase and thus reduces the lagging chromosome rate (Orr et al., 2016).

278 We treated H1 and H9 hESCs and positive control U2OS cancer cells for 45 mins with UMK57  
279 prior to measuring anaphase error rates. To control for off-target effects, we also measured  
280 errors in cells treated for 45 mins with UMK95, an inactive analog of UMK57 (Orr et al., 2016).

281 As expected, short-term UMK57 treatment in U2OS cancer cells significantly reduced  
282 the lagging chromosome rate while UMK95 treatment did not (Figure 3B) (Orr et al., 2016).  
283 Likewise, lagging chromosome rates were significantly reduced by approximately 50% in H1  
284 and H9 hESCs treated with UMK57, but at higher concentrations, while UMK95 treatment did  
285 not (Figure 3B). Also, lagging chromosome rates were selectively reduced while other anaphase  
286 error rates were not (Figure 3B and S3B), highlighting that the mechanisms responsible for  
287 different types of mitotic errors are distinct. Furthermore, unlike in cancer cells, high doses of  
288 UMK57 did not affect H1 or H9 hESC mitotic progression (Figure S3A) (Orr et al., 2016). As  
289 previous, we determined that spontaneously differentiated cells in the H1 and the H9  
290 populations did not account for the error rates (Figure S3E). Moreover, we performed these  
291 experiments using the same batch of H1 and H9 hESCs that we karyotyped for the calcium  
292 stable microtubule assay and showed were diploid within the sensitivity range for the number of  
293 cells scored. Combined, these results demonstrate that destabilizing chromosome microtubule  
294 attachments in hPSCs increases the rate of merotelic error correction, reducing the frequency of  
295 lagging chromosomes (Figure 3A).

296 Although we modeled the effects of mitotic duration and chromosome microtubule  
297 attachment stability on merotelic error correction as two separate and independent pathways  
298 (Figures 2A and 3A), these may influence error correction in a dependent manner. To test this  
299 possibility, we simultaneously measured mitotic duration and errors in H1 H2B-GFP hESCs and  
300 AICS-061 hiPSCs by time-lapse live-cell fluorescence microscopy in the presence of UMK57 for  
301 12 hrs (Figures 3C-D and S3C-D). In contrast to prolonging mitosis with proTAME (Figures S2I

302 and J), destabilizing microtubule attachments with UMK57 significantly reduced lagging  
303 chromosome rates in both H1 H2B-GFP hESCs (Figure 3C) and AICS-061 hiPSCs (Figure 3D)  
304 while UMK95 did not. The chromosome bridge rate also significantly decreased in H1 H2B-GFP  
305 hESCs (Figure 3C), but this was not consistent in the AICS-061 hiPSCs (Figure 3D).

306 Interestingly, there was a significant increase in mitotic duration with UMK57 treatment,  
307 and specifically metaphase, for both H1 H2B-GFP hESCs and AICS-061 hiPSCs while UMK95  
308 treatment did not significantly affect it (Figures S3C-D). However, for H1 H2B-GFP hESCs, the  
309 increase in metaphase duration was comparable to 3  $\mu$ M proTAME treatment (metaphase mean  
310 = 15.8 mins DMSO vs. 27.3 mins 3  $\mu$ M proTAME and metaphase mean = 12.2 mins DMSO vs.  
311 20.4 mins UMK57), which did not significantly reduce the lagging chromosome rate (Figure 2D).  
312 For AICS-061 hiPSCs, no amount of delay in mitotic progression reduced the lagging  
313 chromosome rate (Figure S2I) suggesting that potentiating MCAK depolymerase activity  
314 predominantly enhances error correction by destabilizing microtubule attachments. Thus, mitotic  
315 duration and chromosome microtubule attachment stability are largely two independent  
316 parameters that influence merotelic error correction efficiency.

317 During these experiments, we also monitored the genomic stability of H1 H2B-GFP  
318 hESCs and AICS-061 hiPSCs. Similar to our previous analysis, there were clonal aneuploid  
319 cells with a terminal deletion of the long arm of chromosome 18 present in the AICS-061  
320 population at a low frequency (<10%, 3/32). For the H1 H2B-GFP hESCs, initial karyotyping  
321 done after performing two complete experimental sets found 20 of 20 cells were diploid.  
322 Subsequent karyotyping, after the third experimental set, identified a fraction of abnormal cells  
323 with an interstitial duplication of the long arm of chromosome 20 in the population (25%, 5/20).  
324 Overall, the reduction in lagging chromosome rates upon UMK57 treatment is reproducible  
325 using multiple different hPSC lines arguing that the low incidence of aneuploid cells is unlikely to  
326 influence the outcomes. Collectively, these results support our hypothesis that hyperstable

327 chromosome microtubule attachments contribute to the elevated frequency of erroneous lagging  
328 chromosomes in both hESCs and hiPSCs compared to somatic cells and that decreasing  
329 microtubule attachment stability is an effective strategy to reduce lagging chromosome rates in  
330 hPSCs.

331

### 332 **Developmental potential influences mitotic error rates**

333 Chromosome segregation errors are rare in somatic cells (Figures 1B and D) (Cimini et  
334 al., 1999; Thompson and Compton, 2008), so it is widely assumed that a high fidelity of  
335 chromosome segregation is conserved in normal, non-transformed cells. Consequently, our  
336 repeated observations that mitotic error rates, and particularly lagging chromosome rates, are  
337 elevated in hPSCs compared to somatic cells (Figures 1B and D) coupled with the high mitotic  
338 error rates in preimplantation human embryos (McCoy et al., 2015; Vanneste et al., 2009)  
339 challenge this assumption. The opposing phenotypes of somatic vs. embryonic cells and hPSCs  
340 with respect to the frequency of mitotic errors led us to question whether a high error rate is an  
341 intrinsic and a cell autonomous trait linked to developmental state. This idea predicts that mitotic  
342 error rates and developmental potential correlate such that as developmental potential  
343 decreases mitotic error rates decrease and that as developmental potential increases so do  
344 mitotic error rates (Figure 4A). We tested this prediction using isogenic cells with different  
345 developmental states to eliminate genetic diversity as a confounding variable.

346 We compared mitotic error rates between isogenic normal, primary somatic WTC-11  
347 fibroblasts to parental WTC-11 and the derivative AICS-061 hiPSCs. In agreement with our  
348 prediction, anaphase errors, with lagging chromosomes being the most frequent error, were  
349 significantly elevated in WTC-11 (lagging = 24%) and AICS-061 hiPSCs (lagging = 23%)  
350 compared to isogenic somatic WTC-11 fibroblasts (lagging = 3%) (Figure 4B and S4C). In  
351 addition, we karyotyped somatic WTC-11 fibroblasts and WTC-11 hiPSCs to confirm that  
352 abnormal aneuploid cells present in either population did not exclusively account for the error

353 rates. Somatic WTC-11 fibroblasts were diploid (20/20) while 10% (2/20) of the WTC-11 hiPSCs  
354 had a clonal balanced translocation between the short arm of chromosome 1 and long arm of  
355 chromosome 16; however, even with the hypothetical assumption that all aneuploid cells go  
356 through an aberrant mitosis with a lagging chromosome and discarding 10% of the lagging  
357 chromosome data, lagging chromosome rates remained significantly elevated in WTC-11  
358 hiPSCs compared to somatic WTC-11 fibroblasts (Figure S4D). Furthermore, to confirm the  
359 developmental states of isogenic WTC-11 and AICS-061 hiPSCs and somatic WTC-11  
360 fibroblasts, we quantified the percent of cells expressing the pluripotency transcription factors  
361 OCT4 and NANOG. As expected, somatic WTC-11 fibroblasts did not express OCT4 and  
362 NANOG while nearly 100% of the WTC-11 and AICS-061 hiPSCs did (Figure S4B). Thus, with  
363 increased developmental potential mitotic error rates also increase.

364         If mitotic error rates correlate with developmental potential as we predict (Figure 4A),  
365 then differentiation and loss of pluripotency should decrease error rates. To test this, we  
366 induced undirected differentiation in H1 or H9 hESCs with *all-trans* retinoic acid (RA) (Jain et al.,  
367 2012). During a 4-day time course, DMSO treated control H1 and H9 hESCs maintained their  
368 pluripotent stem cell morphology of tightly packed colonies with smooth borders and a high  
369 nuclear to cytoplasmic ratio while RA treated hESCs acquired a flattened morphology and lower  
370 nuclear to cytoplasmic ratio (Figure S4F) indicative of differentiation. Also, expression of the  
371 pluripotency transcription factors OCT4, NANOG and SOX2 significantly decreased in the RA  
372 treated cells at the endpoint comparable to levels in somatic WTC-11 fibroblasts (Figures S5A-  
373 C) indicating loss of pluripotency. Importantly, after 4 days of RA undirected differentiation,  
374 anaphase error rates, including lagging chromosomes, were significantly decreased by  
375 approximately 50% compared to DMSO control H1 or H9 hESCs (Figures 4C and S4E)  
376 demonstrating that decreasing developmental potential reduces mitotic error rates. We also  
377 observed a slight, but significant increase, in multipolar anaphases; however, the frequency was  
378 less than 3% (Figure S4E).



379 In chimeric mouse embryos and human gastruloids composed of mixed populations of  
380 diploid and aneuploid cells, aneuploid cells are depleted as development progresses and  
381 differentiation occurs (Bolton et al., 2016; Yang et al., 2021). Analogous to this is the possibility  
382 that aneuploid cells present in the starting H1 and H9 populations used for the RA experiments  
383 are responsible for the mitotic errors but become depleted during differentiation thus decreasing  
384 the error rate. This scenario requires that H1 and H9 hESC populations are composed of  
385 aneuploid cells or are mosaic populations of diploid and aneuploid cells. Therefore, we  
386 karyotyped the H1 and the H9 hESC populations after completion of all experimental replicates  
387 reasoning that clonal and/or non-clonal aneuploidies were most likely to be detected after  
388 prolonged culturing. Critically, both the H1 and H9 populations were diploid (20/20) arguing that  
389 depletion of aneuploid cells during differentiation is unlikely to explain the decrease in anaphase  
390 errors. Collectively, our results show that mitotic error rates correlate with developmental  
391 potential and suggest that a high mitotic error rate is an inherent and cell autonomous trait of  
392 hPSCs.

393

#### 394 **Discussion:**

395 Here we show that lagging chromosomes in anaphase, caused by persistent improper  
396 merotelic chromosome microtubule attachments, are the most frequent mitotic error in hPSCs.  
397 Surprisingly, our results reveal that hPSCs are more similar to transformed human cancer cells  
398 than non-transformed normal somatic cells with respect to mitotic error rates, particularly  
399 lagging chromosome rates (Cimini et al., 2001; Godek et al., 2016; Thompson and Compton,  
400 2008). Furthermore, we show that mitotic error rates correlate with developmental potential  
401 decreasing upon loss and increasing upon gain, demonstrating that a high mitotic error rate is  
402 intrinsic to hPSCs. In agreement, multipotent neural stem cells exhibit an intermediate error rate  
403 (~10%) between hPSCs and somatic cells suggesting a linear correlation with developmental  
404 potential (Godek et al., 2016). Collectively, these results demonstrate that a high fidelity of



405 chromosome segregation is not universally conserved in normal, diploid human cells and that it  
406 depends on developmental state. This raises the possibility that in cancer cells the  
407 (re)acquisition of a developmental program with greater potency rather than of mutations in  
408 mitotic genes causes an elevated mitotic error rate in agreement with the low frequency of  
409 genetic alterations found in mitotic genes (Greenman et al., 2007; Nath et al., 2015).

410 Assuming that the chromosome missegregation and lagging chromosome rates are  
411 proportional in hPSCs, analogous to cancer cells (Thompson and Compton, 2008), then lagging  
412 chromosomes are a leading cause of aneuploidy in hPSCs. In hPSCs, the ~20% lagging  
413 chromosome rate is comparable to that of HT29 colon cancer cells which corresponds to a  
414 ~0.3% missegregation rate per chromosome (Thompson and Compton, 2008). Using this  
415 benchmark, we estimate that hPSCs missegregate a chromosome every tenth division. We  
416 assume that missegregation would be random as there is no known bias to preferentially  
417 missegregate a chromosome in unperturbed conditions. Ideally, we would directly measure  
418 chromosome missegregation rates, but the growth of hPSCs as tightly packed colonies  
419 combined with their poor survival as single cells poses challenges to using conventional  
420 techniques (Godek and Compton, 2018; Thompson and Compton, 2008).

421 Although we estimate a high chromosome missegregation rate, we detect a low  
422 frequency of aneuploid hPSCs in culture, indicating that most aneuploid hPSCs are at a  
423 selective disadvantage, thus maintaining a predominately diploid population. In this regard,  
424 hPSCs resemble somatic cells which arrest in the subsequent cell cycle following chromosome  
425 missegregation preserving a homogeneous diploid karyotype (Thompson and Compton, 2010).  
426 In contrast, cancer cells tolerate and propagate with aneuploid genomes (Godek et al., 2016;  
427 Thompson and Compton, 2010). Alternatively, our estimate may be an overestimate, and the  
428 generation of aneuploid progeny is a rarer event in hPSCs. Regardless of the exact  
429 missegregation rate, these results delineate a pathway driving the process of culture adaptation  
430 in hPSCs that selects for reoccurring stable chromosome abnormalities which do outcompete

431 diploid hPSCs (Baker et al., 2007; Mayshar et al., 2010; Taapken et al., 2011). We propose the  
432 process depends on a lagging chromosome that leads to chromosome missegregation  
433 producing aneuploid progeny which are then substrates for culture selection pressures to act on  
434 (Figure 5A). In this scenario, lagging chromosomes, which are an inherent and cell autonomous  
435 trait, are the key agents of change fueling culture adaptation, but this must also be coupled to  
436 the transient survival of aneuploid hPSCs providing an opportunity for selection to occur. How  
437 hPSCs gain initial or transient tolerance to an aneuploid genome is unknown, but hPSCs often  
438 acquire p53 mutations (Merkle et al., 2017) and this may lead to aneuploidy tolerance as shown  
439 in cancer cells (Thompson and Compton, 2010). Subsequently, selection for aneuploid hPSCs  
440 with constitutive stable chromosome abnormalities that support long-term survival and  
441 propagation with a growth advantage over diploid hPSCs occurs (Price et al., 2021). This multi-  
442 step process also explains why culture adaptation often arises during extended culturing (Baker  
443 et al., 2007).

444         Given the causal relationship between lagging chromosomes and chromosome  
445 missegregation combined with the potential consequences of generating aneuploid progeny,  
446 understanding why merotelic attachments persist in hPSCs and devising strategies to reduce  
447 merotelic errors is paramount for the successful use of hPSCs in regenerative medicine  
448 therapies. Here we find that prolonging mitosis or destabilizing chromosome microtubule  
449 attachments using the small molecules proTAME or UMK57, respectively, improves merotelic  
450 error correction reducing lagging chromosomes in hPSCs. We note that prolonging mitosis  
451 using proTAME also decreases the incidence of unaligned chromosomes during mouse  
452 preimplantation development presumably by increasing attachment formation rather than  
453 merotelic error correction (Vázquez-Diez et al., 2019), suggesting that this strategy is broadly  
454 applicable. By extension we predict that these strategies should also suppress aneuploidy rates  
455 in hPSCs, although this remains to be tested. Of interest will be to test long-term UMK57  
456 treatment in hPSCs as cancer cells, but not normal dermal fibroblasts (Barroso-Vilares et al.,

457 2020), become resistant to treatment (Orr et al., 2016). Also, it remains unknown if hPSCs  
458 maintain pluripotency during long-term treatment with these small molecules.

459 Furthermore, our UMK57 results suggest that, similar to cancer cells (Bakhroum et al.,  
460 2009), hyperstable microtubule attachments underlie the elevated frequency of lagging  
461 chromosomes in hPSCs. Measurement of microtubule attachment turnover rates in hPSCs will  
462 be necessary to test this. Although many molecular players regulating microtubule dynamics are  
463 known (Godek et al., 2014), how these networks differ between somatic cells and cancer cells  
464 or hPSCs is unknown. In contrast to aneuploid cancer cells where genetic and transcriptional  
465 heterogeneity is a confounding variable (Stingele et al., 2012; Zhao et al., 2019), hPSCs may  
466 offer a more tractable system to determine the molecular pathways causing hyperstable  
467 microtubule attachments as lagging chromosomes are not exclusive to aneuploid hPSCs.

468 Extending our results to human preimplantation development suggests that lagging  
469 chromosomes are primarily responsible for the high mitotic error and aneuploidy rates of early  
470 human embryonic cells (Figure 5B). In contrast, during mouse preimplantation development,  
471 unaligned chromosomes are the most frequent mitotic error (Vázquez-Diez et al., 2019)  
472 suggesting different mechanisms are responsible for chromosome missegregation in mouse vs.  
473 human embryogenesis. This difference may contribute to the discrepancy in aneuploidy rates  
474 with 5% of mouse embryos (Hassold and Hunt, 2001; Lightfoot et al., 2006; Wei et al., 2011)  
475 and 25-90% of human embryos exhibiting aneuploidy (Baart et al., 2006; Fragouli et al., 2008,  
476 2013; McCoy et al., 2015; Mertzaniidou et al., 2013; Vanneste et al., 2009). In addition, IVF  
477 preimplantation embryos exhibit the related phenomena of chromosomal instability (CIN) that  
478 requires (1) persistent chromosome missegregation coupled with (2) the survival and  
479 propagation of aneuploid progeny (Orr et al., 2015; Thompson and Compton, 2008, 2010)  
480 producing heterogeneous aneuploid cells in a single embryo (Mertzaniidou et al., 2013;  
481 Vanneste et al., 2009). Although a recent study of preimplantation bovine embryos, models for  
482 human embryogenesis, found that a failure of parental pronuclei to properly cluster and

483 condense their chromosomes led to an increase in errors (Cavazza et al., 2021), parental  
484 genome clustering is unique to the first mitotic division and thus cannot account for the repeated  
485 mitotic errors that must occur to generate embryos with a CIN phenotype. Rather, erroneous  
486 lagging chromosomes are not restricted to specialized mitotic divisions and thus provide a  
487 mechanism for the CIN phenotype of human preimplantation embryos (Mertzanidou et al., 2013;  
488 Vanneste et al., 2009). Furthermore, although we estimate that every tenth division in hPSCs  
489 generates aneuploid progeny, this may underestimate the chromosome missegregation rate in  
490 human embryos given the prevalence of CIN in IVF cleavage stage embryos indicating repeated  
491 mitotic errors occurring within a few divisions (Mertzanidou et al., 2013; Vanneste et al., 2009).  
492 Future investigations, using other model systems for human preimplantation development, will  
493 be necessary to determine if the same mechanisms are responsible for mitotic errors as in  
494 hPSCs.

495         The CIN phenotype of preimplantation embryos also requires at least an initial tolerance  
496 to an aneuploid genome. How this occurs and whether a similar mechanism supports a limited  
497 tolerance to an aneuploid genome in hPSCs (providing an opportunity for culture selection to  
498 occur) is unknown. Accordingly, this raises the question of how euploid embryos are established  
499 to support normal development. Like most aneuploid hPSCs, aneuploid preimplantation  
500 embryonic cells may be at a selective disadvantage when in competition with diploid embryonic  
501 cells. In support, some mosaic blastocysts composed of diploid and aneuploid cells were  
502 euploid 12 days post-fertilization (Popovic et al., 2019) and transferred mosaic IVF embryos can  
503 result in normal development and live births (Yang et al., 2021). Importantly, our results suggest  
504 that the establishment of euploid embryos is also supported by declining mitotic error rates as  
505 developmental potential decreases and differentiation occurs (Figure 5B). Thus, during human  
506 development genome stability is achieved because the time window comprising embryonic cells  
507 with high developmental potency and high mitotic error rates is limited. In contrast, the time  
508 window is unlimited for hPSCs growing in culture. In conclusion, we propose that in normal

509 human cells developmental state differentially influences the fidelity of chromosome segregation  
510 and the response to aneuploidy.

511

## 512 **Experimental Procedures:**

### 513 **Cell Lines**

514 Primary BJ fibroblasts (CRL-2522) and U2OS (HTB-96) cell lines used in this study are  
515 available from the American Type Culture Collection (ATCC). We generated RPE-1 cells stably  
516 expressing H2B-GFP using parental RPE-1 (CRL-4000) cells available from ATCC. H1/WA01  
517 and H9/WA09 hESCs are available from WiCell Research Institute. WTC-11 (GM25256) and  
518 AICS-061 hiPSCs are available from the Coriell Institute for Medical Research and Allen  
519 Institute for Cell Science, respectively. H1 H2B-GFP hESCs used in this study were obtained  
520 from Dr. Jonathan S. Draper, McMaster University. H1 H2B-GFP hESCs also express a G1  
521 reporter, but we did not monitor G1 phase in our experiments. WTC fibroblasts were obtained  
522 the Gladstone Stem Cell Core.

523

### 524 **Cell Culture**

525 U2OS (XX) cells were grown in Dulbecco's Modified Eagle's Medium (DMEM)  
526 supplemented with 10% fetal calf serum (FCS), 50 U/mL penicillin and 50 µg/mL streptomycin  
527 and 250 µg/L Amphotericin B. RPE-1 H2B-GFP (XX) cells were grown in DMEM supplemented  
528 with 10% fetal calf serum (FCS), 50 U/mL penicillin and 50 µg/mL streptomycin, 250 µg/L  
529 Amphotericin B, 20 mM HEPES and 5 µg/ml blasticidin. BJ fibroblast (XY) cells were grown in  
530 Eagle's Minimum Essential Medium (EMEM) supplemented with 10% fetal bovine serum (FBS)  
531 and 100 U/mL penicillin and 100 µg/mL streptomycin. WTC fibroblast (XY) cells were grown in  
532 DMEM supplemented with 10% FBS, 2 mM GlutaMAX-1 (ThermoFisher #35050061), 0.1 mM  
533 MEM nonessential amino acids and 100 U/mL penicillin and 100 µg/mL streptomycin. H1/WA01

534 hESCs (XY), H9/WA09 hESCs (XX), WTC-11 hiPSCs (XY) and AICS-061 hiPSCs (XY) were  
535 grown in mTeSR1 medium (StemCell Technologies #85870). H1 H2B-GFP hESCs (XY) were  
536 grown in mTeSR1 supplemented with 1  $\mu\text{g}/\text{mL}$  puromycin. All pluripotent stem cell lines were  
537 routinely grown on hESC qualified Matrigel (Corning #354277). For routine passaging, H1, H9  
538 and H1 H2B-GFP hESCs and WTC-11 hiPSCs were dissociated using versene according to  
539 WiCell or Coriell Institute protocols, respectively. AICS-061 hiPSCs were passaged using  
540 StemPro Accutase (ThermoFisher #A1110501) in the presence of ROCK inhibitor Y-27632  
541 (Tocris #1254) for an initial  $\sim 20$  hrs according to Allen Institute protocols. WTC-11 fibroblasts  
542 were routinely passaged using TrypLE Select (ThermoFisher #12563011), and BJ fibroblasts,  
543 U2OS and RPE-1 H2B-GFP cells were passaged using 0.05% trypsin. All cell lines were  
544 validated as mycoplasma free (Sigma-Aldrich Lookout<sup>®</sup> Mycoplasma PCR Detection Kit #  
545 MP0035) and grown at 37°C in a humidified atmosphere with 5% CO<sub>2</sub>. The karyotypes of  
546 human pluripotent stem cell lines and isogenic WTC fibroblasts used in this manuscript were  
547 verified with by G-banded karyotyping provided by WiCell Research Institute.

548 RPE-1 H2B-GFP cells were transfected with the pBOS H2B-GFP vector (BD  
549 Biosciences) using Fugene 6 (Promega #E2691) following manufacturer's instructions. RPE-1  
550 cells stably expressing H2B-GFP were selected using 5  $\mu\text{g}/\text{ml}$  blasticidin and subsequently  
551 single cell clones were isolated using limiting dilution.

552

### 553 **Immunofluorescence**

554 H1 and H9 hESCs and WTC-11 hiPSCs were plated as aggregates on Matrigel-coated  
555 18 mm glass coverslips in 12-well cell culture plates unless otherwise noted in the figure  
556 legends. Alternatively, H1 and H9 hESCs were dissociated to single cells using TrypLE Select  
557 and plated on Laminin-521 (Biological Industries #05-753-1F) coverslips coated at 0.5  $\mu\text{g}/\text{cm}^2$ .  
558 AICS-061 hiPSCs were dissociated to single cells using StemPro Accutase and plated on

559 Matrigel-coated 18 mm glass coverslips in 12-well cell culture plates with ROCK inhibitor for an  
560 initial ~20 hrs and then subsequently the ROCK inhibitor was washed out. For AICS-061  
561 hPSCs, all experiments were performed at least 24 hrs after the removal of ROCK inhibitor. BJ  
562 fibroblasts, WTC fibroblasts and U2OS cells were plated on standard 18 mm glass coverslips in  
563 12-well cell culture plates prior to fixation.

564 For quantification of the pluripotency transcription factors OCT4 and NANOG, cells were  
565 fixed with 3.5% paraformaldehyde for 5 mins at room temperature, permeabilized with Tris-  
566 buffered saline (TBS) with 0.1% Triton X-100 for 2 × 5 mins and blocked with TBS with 2%  
567 bovine serum albumin (BSA) and 0.1% Triton X-100 for 30 mins at room temperature or  
568 overnight at 4°C. Primary antibodies were diluted in TBS + 2% BSA + 0.1% Triton X-100 at 5  
569 µg/mL (rabbit anti-OCT4, Abcam #ab19857), 1:200 (mouse anti-NANOG, Abcam #ab173368) or  
570 1:150 (rabbit anti-NANOG, Abcam #ab109250), and coverslips were incubated for 2 hrs at room  
571 temperature. Cells were then washed with TBS + 2% BSA + 0.1% Triton X-100 for 4 × 5 mins.  
572 Secondary antibodies were diluted in TBS + 2% BSA + 0.1% Triton X-100 + 0.5 µg/mL DAPI at  
573 1:1000 and coverslips were incubated for 1 h at room temperature. Cells were washed with TBS  
574 + 2% BSA + 0.1% Triton X-100 for 2 × 5 mins, TBS + 0.1% Triton X-100 for 5 mins and TBS  
575 buffer for 5 mins sequentially. Coverslips were mounted on glass slides using ProLong Gold  
576 antifade (ThermoFisher #P36934) reagent. For SOX2 immunofluorescence, cells were fixed in  
577 3.5% paraformaldehyde for 5 mins, washed 2 × 5 mins with TBS + 0.1% Triton X-100, blocked  
578 with TBS + 2% BSA + 0.1% Triton X-100 + 10% donkey serum overnight at 4°C. Subsequently  
579 the standard immunostaining protocol as described above was followed. The SOX2 primary  
580 antibody was used at 10 µg/mL (mouse anti-SOX2, R&D Systems #MAB2018).

581 For measuring the frequency of chromosome segregation errors, cells were fixed with  
582 ice-cold methanol for 5 mins and then permeabilized with high-salt TBS (containing 225 mM  
583 NaCl) with 0.1% Triton X-100 for 2 × 5 mins and blocked with high-salt TBS with 2% BSA and



584 0.1% Triton X-100 for 30 mins at room temperature or overnight at 4°C. Primary antibodies were  
585 diluted in high-salt TBS + 2% BSA + 0.1% Triton X-100 at 1:4000 (mouse anti- $\alpha$ -tubulin, Sigma  
586 #T6199) and 2  $\mu$ g/mL (rabbit anti-CENP-A, Dr. A. Straight. Stanford University). To assess  
587 calcium stable chromosome microtubule attachments, cells were pre-extracted with calcium  
588 buffer (100 mM PIPES, 1 mM MgCl<sub>2</sub>, 0.1 mM CaCl<sub>2</sub>, 1% Triton X-100, pH = 6.8) for 5 mins and  
589 subsequently fixed with 1% glutaraldehyde in PBS for 10 mins. Coverslips were washed with  
590 0.5 mg/mL sodium borohydride (NaBH<sub>4</sub>, dissolved in PBS) for 2 × 10 mins and then rinsed with  
591 PBS prior to blocking with TBS + 2% BSA + 0.5% Triton X-100 for 30 mins at room temperature.  
592 Cells were stained with primary antibodies diluted with TBS + 2% BSA + 0.1% Triton X-100 at  
593 1:1000 (human anti-ACA, Geisel School of Medicine at Dartmouth) and 1:4000 (mouse anti- $\alpha$ -  
594 tubulin, Sigma) following the standard immunostaining protocol as described above. The  
595 following secondary antibodies (diluted at 1:1000) were used in this study: donkey anti-mouse  
596 Alexa Fluor 488, goat anti-rabbit Alexa Fluor 594, donkey anti-mouse Alexa Fluor 647, donkey  
597 goat anti-human Alexa Fluor 594, donkey anti-rabbit Alexa Fluor 647 (ThermoFisher #A-21202,  
598 #A-11037, #A-31571, #A-11014 and #A-31573, respectively).

599

## 600 **Microscopy for Immunofluorescence**

601 Images were acquired with either a Hamamatsu ORCA-Fusion Gen III Scientific CMOS  
602 camera mounted on a Nikon Eclipse Ti2E microscope with a Nikon CFI Plan Apo Lambda 60 $\times$ ,  
603 1.4 numerical aperture oil immersion objective, an Andor cooled CCD camera mounted on a  
604 Nikon Ti microscope with a Nikon Plan Apo VC 60 $\times$ , 1.4 numerical aperture oil immersion  
605 objective or a spinning-disc confocal microscopy system (Micro Video Instruments) featuring a  
606 Nikon Eclipse Ti microscope equipped with an Andor CSU-W1 two-camera spinning disc  
607 module, Andor dual Zyla sCMOS cameras, an Andor ILE laser module, and a Nikon Plan Apo



608 Lambda 60×, 1.4 numerical aperture oil immersion objective at room temperature. Image series  
609 in the Z-axis were obtained using either 0.2 μm or 0.5 μm optical sections.

610 For experiments comparing the percentage of cells expressing a protein of interest or  
611 quantifications of proteins levels, images for each cell line were acquired with the same  
612 acquisition parameters and exposure times. Image deconvolution and contrast enhancement  
613 were performed using NIS Batch Deconvolution (Nikon), NIS Elements (Nikon), ImageJ (NIH)  
614 and Photoshop (Adobe). Images shown are maximum intensity projections (chromosome  
615 segregation errors) or sum intensity projections (chromosome microtubule attachments and  
616 pluripotency markers) of selected Z-planes.

617 Criteria for scoring chromosome segregation errors is as follows: the presence of a  
618 chromosome that lags behind the segregating chromosomal mass and has clear centromere  
619 staining in anaphase is scored as a lagging chromosome. The presence of a chromosome  
620 without centromere staining between two segregating chromosomal masses in anaphase is  
621 scored as an acentric DNA fragment. The presence of chromosome spanning between  
622 segregating chromosomal masses in anaphase is scored as a chromosome bridge. A  
623 chromosome that never aligns to the metaphase plane and presents proximal to the spindle  
624 pole at anaphase onset is scored as an unaligned chromosome. An anaphase where  
625 chromosomes segregate to more than two poles is scored as a multipolar anaphase. An  
626 anaphase with multiple errors were scored as combination.

627

## 628 **Quantification of Protein Expression**

629 To determine the percentage of cells expressing a protein of interest, sum intensity  
630 projections were compiled from Z-stack images using ImageJ (NIH). Then the maximum and  
631 minimum display values were scaled equivalently among different cell lines using somatic cell  
632 lines as a negative background control. Single cells were then categorized as positive or  
633 negative for expression of a protein of interest. For quantification of protein levels, sum intensity

634 projections were compiled from Z-stack images using ImageJ (NIH). Nuclei were randomly  
635 picked per field of view based upon the DAPI signal. An elliptical region of interest (ROI) was  
636 drawn to encompass the whole nucleus and then a slightly larger elliptical ROI was drawn to  
637 encompass both the nucleus and the background. The mean background intensity was  
638 calculated based on the in-between background region of the two ROIs. Expression level of a  
639 protein of interest in each nucleus was represented by the background subtracted mean  
640 intensity of the ROI that encompasses the nucleus.

641

### 642 **Time-Lapse Live-Cell Fluorescence Imaging**

643 RPE-1 H2B-GFP cells were plated in standard DMEM media on 18 mm glass coverslips  
644 in 12-well cell culture plates and incubated overnight at 37°C in a humidified atmosphere with  
645 5% CO<sub>2</sub>. The next day, coverslips were washed with phenol-free media supplemented with  
646 0.1% DMSO, 3 μM or 6 μM proTAME (Tocris #I-440-01M) and mounted in modified rose  
647 chambers. For monastrol arrest and release experiments, the next day following overnight  
648 incubation, coverslips were washed into standard DMEM media supplemented with 100 μM  
649 monastrol (Tocris #1305) and maintained for 6 hrs at 37°C in a humidified atmosphere with 5%  
650 CO<sub>2</sub>. After 6 hrs, cells were released by washing into phenol-free media supplemented with  
651 0.1% DMSO, 3 μM or 6 μM proTAME (Tocris) and mounted in modified rose chambers. Live-  
652 cell imaging was performed at 37°C using an Andor cooled CCD camera mounted on a Nikon Ti  
653 microscope with a Nikon Plan Apo VC 60×, 1.4 numerical aperture oil immersion objective with  
654 binning set to 2×2. Image series in the Z-axis were obtained using 1 μm optical sections. Cells  
655 were imaged for 16 hrs with a 2 min time interval for proTAME only experiments or 5 hrs with a  
656 2 min time interval for monastrol arrest and release experiments

657 H1 H2B-GFP hESCs and AICS-061 hiPSCs were plated in standard mTeSR1 media on  
658 the 35 mm glass bottom dishes (MatTek #P35G-1.5-14-C) coated with Matrigel or Laminin-521

659 and incubated for 1-3 days at 37°C in a humidified atmosphere with 5% CO<sub>2</sub> prior to live-cell  
660 imaging. HPSCs were washed with phenol-free mTeSR1 media three times to get rid of spent  
661 media and then cultured in phenol-free mTeSR1 during live-cell imaging. Live-cell imaging was  
662 performed at 37°C in a humidified environment with 5% CO<sub>2</sub> (Tokai Hit Stage-top Incubation  
663 System) using either a Hamamatsu ORCA-Fusion Gen III Scientific CMOS camera mounted on  
664 a Nikon Eclipse Ti2E microscope with a Nikon CFI Plan Apo Lambda 60×, 1.4 numerical  
665 aperture oil immersion objective with binning set to 2×2 or using spinning-disc confocal  
666 microscopy system (Micro Video Instruments) featuring a Nikon Eclipse Ti microscope equipped  
667 with an Andor CSU-W1 two-camera spinning disc module, Andor dual Zyla sCMOS cameras,  
668 an Andor ILE laser module, and a Nikon Plan Apo Lambda 60×, 1.4 numerical aperture oil  
669 immersion objective with binning set to 2×2. Image series in the Z-axis were obtained using 1  
670 μm optical sections. HPSCs were imaged for 7 hours with 2 min time interval (wide-field  
671 fluorescence) or 12 hours with 2 min time interval (spinning-disc confocal). Of note, we  
672 optimized these experiments using the lowest exposure and intensity settings permissible to  
673 visualize errors while minimizing artifacts due to phototoxicity.

674 Image acquisitions and analyses were performed using NIS Elements (Nikon) and  
675 ImageJ (NIH). Representative images from live-cell imaging shown in this study are maximum  
676 intensity projections of all Z-planes or a single Z-plane. Cells undergoing mitosis were tracked  
677 from nuclear envelope breakdown (NEB) to anaphase onset, during which prometaphase (NEB  
678 to metaphase), metaphase (metaphase to anaphase onset) or total mitotic (NEB to anaphase  
679 onset) durations were recorded. In combination with mitotic duration, anaphase errors including  
680 lagging chromosomes, chromosome bridges, multipolar anaphases, unaligned chromosomes,  
681 or combinations of multiple errors were observed and scored. Criteria for scoring errors are  
682 described in the immunofluorescence section.

683

## 684 **Drug Treatments**

685 For immunofluorescence, cells were treated with 0.1% DMSO, UMK57 or UMK95 (Dr. B  
686 Kwok, University of Montreal) at the concentrations specified for 45 min prior to fixation. For  
687 time-lapse live-cell imaging, hPSCs were cultured in phenol-free mTeSR1 supplemented with  
688 0.1% DMSO, 3  $\mu$ M, 6  $\mu$ M or 20  $\mu$ M proTAME (Tocris) or 2  $\mu$ M UMK57 or UMK95 during  
689 imaging. RPE-1 H2B-GFP cells were cultured in phenol-free media supplemented with 0.1%  
690 DMSO, 3  $\mu$ M or 6  $\mu$ M proTAME (Tocris). For monastrol arrest and release experiments, RPE-1  
691 H2B-GFP cells were arrested in 100  $\mu$ M Monastrol (Tocris) for 6 hrs followed by washout with  
692 phenol-free media into 0.1% DMSO, 3  $\mu$ M or 6  $\mu$ M proTAME (Tocris).

693

#### 694 **All-*trans* Retinoic Acid Differentiation Assay**

695 H1 and H9 hESCs were plated on Matrigel-coated 18mm glass coverslips and grown in  
696 mTeSR1 in 12-well cell culture plates. After 24 h, 1  $\mu$ M all-*trans* retinoic acid (RA)(Sigma  
697 #R2625) was added to fresh mTeSR1 media. hPSCs were treated with daily media changes  
698 including 1  $\mu$ M RA for 4 days prior to fixation. Daily morphological changes were monitored by  
699 bright-field phase contrast microscopy using a Hamamatsu ORCA®-Fusion Gen III Scientific  
700 CMOS camera mounted on a Nikon Eclipse Ti2E microscope with a Nikon CFI Super Plan Fluor  
701 LWD 20 $\times$  ADM, 0.7 numerical aperture air objective. Image series in the Z-axis were obtained  
702 using 1  $\mu$ m optical sections. Image acquisition and analysis were performed using NIS Elements  
703 (Nikon) and ImageJ (NIH). Representative images shown in Supplementary Fig. 4 are from  
704 selected single Z-plane that best illustrates the morphology.

705

#### 706 **Statistics**

707 GraphPad Prism was used for all statistical analysis. Statistical details can be found in  
708 the figure legends which describe the statistical tests used and corresponding n values. Error  
709 bars represent standard deviation (SD). All experiments were performed in three or more

710 replicates. Significance was defined as \* $p < 0.05$ , \*\* $p < 0.01$ , \*\*\* $p < 0.001$ , \*\*\*\* $p < 0.0001$ . No  
711 outliers were excluded in data analysis.

712

713 **Acknowledgements:**

714 We thank Jonathan Draper, Aaron Straight, Bruce Conklin, Benjamin Kwok, and Thorsten  
715 Schlaeger for providing reagents or technical advice. We thank Ann Lavanway and the  
716 Dartmouth College Life Sciences Light Microscopy Facility for assistance with microscopy. Also,  
717 we thank members of the Compton and Godek laboratories for their helpful discussions and  
718 comments, particularly Thomas Kucharski for his suggestions. This work was supported by  
719 grant funding from the National Institutes of Health GM051542 to DAC and R01HD101436 to  
720 KMG and a Hitchcock Foundation Pilot grant to KMG.

721

722 **Author Contributions:**

723 Conceptualization-KMG; Methodology- KMG, CD, and AY; Validation-KMG, CD and AY; Formal  
724 Analysis-KMG, CD and AY; Investigation-KMG, CD and AY; Resources-KMG and DAC; Writing-  
725 Original Draft- KMG and CD; Writing-Review and Editing- KMG, CD, DAC and AY;  
726 Visualization-KMG and CD; Supervision-KMG; Funding Acquisition-KMG and DAC.

727

728 **Declaration of Interests:**

729 The authors declare no competing interests.

730

731 **References:**

732

733 Baart, E.B., Martini, E., Berg, I. van den, Macklon, N.S., Galjaard, R.-J.H., Fauser, B.C.J.M., and Opstal,  
734 D.V. (2006). Preimplantation genetic screening reveals a high incidence of aneuploidy and mosaicism in  
735 embryos from young women undergoing IVF. *Human Reproduction* 21, 223–233.

- 736 Baker, D., Hirst, A.J., Gokhale, P.J., Juarez, M.A., Williams, S., Wheeler, M., Bean, K., Allison, T.F.,  
737 Moore, H.D., Andrews, P.W., et al. (2016). Detecting Genetic Mosaicism in Cultures of Human  
738 Pluripotent Stem Cells. *Stem Cell Reports* 7, 998–1012.
- 739 Baker, D.E.C., Harrison, N.J., Maltby, E., Smith, K., Moore, H.D., Shaw, P.J., Heath, P.R., Holden, H.,  
740 and Andrews, P.W. (2007). Adaptation to culture of human embryonic stem cells and oncogenesis in  
741 vivo. *Nature Biotechnology* 25, nbt1285.
- 742 Bakhoun, S.F., Thompson, S.L., Manning, A.L., and Compton, D.A. (2008). Genome stability is ensured  
743 by temporal control of kinetochore–microtubule dynamics. *Nature Cell Biology* 11, 27–35.
- 744 Bakhoun, S.F., Genovese, G., and Compton, D.A. (2009). Deviant Kinetochore Microtubule Dynamics  
745 Underlie Chromosomal Instability. *Current Biology* 19, 1937–1942.
- 746 Barroso-Vilares, M., Macedo, J.C., Reis, M., Warren, J.D., Compton, D., and Logarinho, E. (2020).  
747 Small-molecule inhibition of aging-associated chromosomal instability delays cellular senescence. *Embo*  
748 *Rep* 21, e49248.
- 749 Becker, K.A., Ghule, P.N., Therrien, J.A., Lian, J.B., Stein, J.L., Wijnen, A.J. van, and Stein, G.S. (2006).  
750 Self-renewal of human embryonic stem cells is supported by a shortened G1 cell cycle phase. *Journal of*  
751 *Cellular Physiology* 209, 883–893.
- 752 Bolton, H., Graham, S.J.L., Aa, N.V. der, Kumar, P., Theunis, K., Gallardo, E.F., Voet, T., and Zernicka-  
753 Goetz, M. (2016). Mouse model of chromosome mosaicism reveals lineage-specific depletion of  
754 aneuploid cells and normal developmental potential. *Nature Communications* 7, 11165.
- 755 Burrell, R.A., McClelland, S.E., Endesfelder, D., Groth, P., Weller, M.-C., Shaikh, N., Domingo, E.,  
756 Kanu, N., Dewhurst, S.M., Gronroos, E., et al. (2013). Replication stress links structural and numerical  
757 cancer chromosomal instability. *Nature* 494, 492.
- 758 Calder, A., Roth-Albin, I., Bhatia, S., Pilquil, C., Lee, J.H., Bhatia, M., Levadoux-Martin, M., McNicol,  
759 J., Russell, J., Collins, T., et al. (2013). Lengthened G1 Phase Indicates Differentiation Status in Human  
760 Embryonic Stem Cells. *Stem Cells and Development* 22, 279–295.
- 761 Cavazza, T., Takeda, Y., Politi, A.Z., Aushev, M., Aldag, P., Baker, C., Choudhary, M., Bucevičius, J.,  
762 Lukinavičius, G., Elder, K., et al. (2021). Parental genome unification is highly error-prone in mammalian  
763 embryos. *Cell* 184, 2860-2877.e22.
- 764 Cimini, D., Tanzarella, C., and Degrossi, F. (1999). Differences in malsegregation rates obtained by  
765 scoring ana-telophases or binucleate cells. *Mutagenesis* 14, 563–568.
- 766 Cimini, D., Howell, B., Maddox, P., and cell ..., K.-A. of (2001). Merotelic kinetochore orientation is a  
767 major mechanism of aneuploidy in mitotic mammalian tissue cells.
- 768 Cimini, D., Moree, B., Canman, J.C., and Salmon, E.D. (2003). Merotelic kinetochore orientation occurs  
769 frequently during early mitosis in mammalian tissue cells and error correction is achieved by two  
770 different mechanisms. *Journal of Cell Science* 116, 4213–4225.

- 771 Cimini, D., Wan, X., Hirel, C.B., and Salmon, E.D. (2006). Aurora Kinase Promotes Turnover of  
772 Kinetochore Microtubules to Reduce Chromosome Segregation Errors. *Current Biology* *16*, 1711–1718.
- 773 Fragkos, M., and Naim, V. (2017). Rescue from replication stress during mitosis. *Cell Cycle* *16*, 613–633.
- 774 Fragouli, E., Lenzi, M., Ross, R., Katz-Jaffe, M., Schoolcraft, W.B., and Wells, D. (2008).  
775 Comprehensive molecular cytogenetic analysis of the human blastocyst stage. *Human Reproduction* *23*,  
776 2596–2608.
- 777 Fragouli, E., Alfarawati, S., Spath, K., Jaroudi, S., Sarasa, J., Enciso, M., and Wells, D. (2013). The  
778 origin and impact of embryonic aneuploidy. *Human Genetics* *132*, 1001–1013.
- 779 Godek, K.M., and Compton, D.A. (2018). Quantitative methods to measure aneuploidy and chromosomal  
780 instability.
- 781 Godek, K.M., Kabeche, L., and Compton, D.A. (2014). Regulation of kinetochore–microtubule  
782 attachments through homeostatic control during mitosis. *Nature Reviews Molecular Cell Biology* *16*,  
783 nrm3916.
- 784 Godek, K.M., Venere, M., Wu, Q., Mills, K.D., Hickey, W.F., Rich, J.N., and Compton, D.A. (2016).  
785 Chromosomal Instability Affects the Tumorigenicity of Glioblastoma Tumor-Initiating Cells. *Cancer*  
786 *Discovery* *6*, 532–545.
- 787 Greenman, C., Stephens, P., Smith, R., Dalgliesh, G.L., Hunter, C., Bignell, G., Davies, H., Teague, J.,  
788 Butler, A., Stevens, C., et al. (2007). Patterns of somatic mutation in human cancer genomes. *Nature* *446*,  
789 153.
- 790 Halliwell, J.A., Frith, T.J.R., Laing, O., Price, C.J., Bower, O.J., Stavish, D., Gokhale, P.J., Hewitt, Z., El-  
791 Khamisy, S.F., Barbaric, I., et al. (2020). Nucleosides Rescue Replication-Mediated Genome Instability  
792 of Human Pluripotent Stem Cells. *Stem Cell Rep* *14*, 1009–1017.
- 793 Hassold, T., and Hunt, P. (2001). To err (meiotically) is human: the genesis of human aneuploidy. *Nature*  
794 *Reviews Genetics* *2*, 35066065.
- 795 Hayashi, Y., Hsiao, E.C., Sami, S., Lancero, M., Schlieve, C.R., Nguyen, T., Yano, K., Nagahashi, A.,  
796 Ikeya, M., Matsumoto, Y., et al. (2016). BMP-SMAD-ID promotes reprogramming to pluripotency by  
797 inhibiting p16/INK4A-dependent senescence. *Proc National Acad Sci* *113*, 13057–13062.
- 798 Jain, A.K., Allton, K., Iacovino, M., Mahen, E., Milczarek, R.J., Zwaka, T.P., Kyba, M., and Barton,  
799 M.C. (2012). p53 Regulates Cell Cycle and MicroRNAs to Promote Differentiation of Human Embryonic  
800 Stem Cells. *PLoS Biology* *10*, e1001268.
- 801 Keller, A., and Spits, C. (2021). The Impact of Acquired Genetic Abnormalities on the Clinical  
802 Translation of Human Pluripotent Stem Cells. *Cells* *10*, 3246.
- 803 Knouse, K.A., Wu, J., Whittaker, C.A., and Amon, A. (2014). Single cell sequencing reveals low levels  
804 of aneuploidy across mammalian tissues. *Proceedings of the National Academy of Sciences* *111*, 13409–  
805 13414.



- 806 Knouse, K.A., Lopez, K.E., Bachofner, M., and Amon, A. (2018). Chromosome Segregation Fidelity in  
807 Epithelia Requires Tissue Architecture. *Cell*.
- 808 Lamm, N., Ben-David, U., Golan-Lev, T., Storchová, Z., Benvenisty, N., and Kerem, B. (2016). Genomic  
809 Instability in Human Pluripotent Stem Cells Arises from Replicative Stress and Chromosome  
810 Condensation Defects. *Cell Stem Cell* 18, 253–261.
- 811 Lightfoot, D.A., Kouznetsova, A., Mahdy, E., Wilbertz, J., and Höög, C. (2006). The fate of mosaic  
812 aneuploid embryos during mouse development. *Developmental Biology* 289, 384–394.
- 813 Macklon, N., Geraedts, J., and Fauser, B. (2002). Conception to ongoing pregnancy: the “black box” of  
814 early pregnancy loss. *Human Reproduction Update* 8, 333–343.
- 815 Mayshar, Y., Ben-David, U., Lavon, N., Biancotti, J.-C., Yakir, B., Clark, A.T., Plath, K., Lowry, W.E.,  
816 and Benvenisty, N. (2010). Identification and Classification of Chromosomal Aberrations in Human  
817 Induced Pluripotent Stem Cells. *Cell Stem Cell* 7, 521–531.
- 818 McCoy, R.C. (2017). Mosaicism in Preimplantation Human Embryos: When Chromosomal  
819 Abnormalities Are the Norm. *Trends in Genetics* 33, 448–463.
- 820 McCoy, R.C., Demko, Z.P., Ryan, A., Banjevic, M., Hill, M., Sigurjonsson, S., Rabinowitz, M., and  
821 Petrov, D.A. (2015). Evidence of Selection against Complex Mitotic-Origin Aneuploidy during  
822 Preimplantation Development. *PLOS Genetics* 11, e1005601.
- 823 Menasha, J., Levy, B., Hirschhorn, K., and Kardon, N.B. (2005). Incidence and spectrum of chromosome  
824 abnormalities in spontaneous abortions; New insights from a 12-year study. *Genetics in Medicine*  
825 7, 251–263.
- 826 Merkle, F.T., Ghosh, S., Kamitaki, N., Mitchell, J., Avior, Y., Mello, C., Kashin, S., Mekhoubad, S., Ilic,  
827 D., Charlton, M., et al. (2017). Human pluripotent stem cells recurrently acquire and expand dominant  
828 negative P53 mutations. *Nature* 545, 229.
- 829 Mertzaniidou, A., Wilton, L., Cheng, J., Spits, C., Vanneste, E., Moreau, Y., Vermeesch, J.R., and  
830 Sermon, K. (2013). Microarray analysis reveals abnormal chromosomal complements in over 70% of 14  
831 normally developing human embryos. *Human Reproduction* 28, 256–264.
- 832 Milagre, I., Pereira, C., Oliveira, R.A., and Jansen, L.E.T. (2020). Reprogramming of human cells to  
833 pluripotency induces CENP-A chromatin depletion. *Open Biol* 10, 200227.
- 834 Musacchio, A., and Salmon, E.D. (2007). The spindle-assembly checkpoint in space and time. *Nature*  
835 *Reviews Molecular Cell Biology* 8, 379–393.
- 836 Nath, S., Ghatak, D., Das, P., and Roychoudhury, S. (2015). Transcriptional Control of Mitosis:  
837 Deregulation and Cancer. *Front Endocrinol* 6, 60.
- 838 Orr, B., Godek, K.M., and Compton, D. (2015). Aneuploidy. *Current Biology* 25, R538–R542.
- 839 Orr, B., Talje, L., Liu, Z., Kwok, B.H., and Compton, D.A. (2016). Adaptive Resistance to an Inhibitor of  
840 Chromosomal Instability in Human Cancer Cells. *Cell Reports* 17, 1755–1763.



- 841 Passerini, V., Ozeri-Galai, E., Pagter, M.S. de, Donnelly, N., Schmalbrock, S., Kloosterman, W.P.,  
842 Kerem, B., and Storchová, Z. (2016). The presence of extra chromosomes leads to genomic instability.  
843 *Nature Communications* 7, 10754.
- 844 Peterson, S.E., Westra, J.W., Rehen, S.K., Young, H., Bushman, D.M., Paczkowski, C.M., Yung, Y.C.,  
845 Lynch, C.L., Tran, H.T., Nickey, K.S., et al. (2011). Normal Human Pluripotent Stem Cell Lines Exhibit  
846 Pervasive Mosaic Aneuploidy. *PLoS ONE* 6, e23018.
- 847 Popovic, M., Dhaenens, L., Taelman, J., Dheedene, A., Bialecka, M., Sutter, P.D., Lopes, S.M.C. de S.,  
848 Menten, B., and Heindryckx, B. (2019). Extended in vitro culture of human embryos demonstrates the  
849 complex nature of diagnosing chromosomal mosaicism from a single trophectoderm biopsy. *Human*  
850 *Reproduction* (Oxford, England).
- 851 Price, C.J., Stavish, D., Gokhale, P.J., Stevenson, B.A., Sargeant, S., Lacey, J., Rodriguez, T.A., and  
852 Barbaric, I. (2021). Genetically variant human pluripotent stem cells selectively eliminate wild-type  
853 counterparts through YAP-mediated cell competition. *Dev Cell* 56, 2455-2470.e10.
- 854 Salimian, K.J., Ballister, E.R., Smoak, E.M., Wood, S., Panchenko, T., Lampson, M.A., and Black, B.E.  
855 (2011). Feedback Control in Sensing Chromosome Biorientation by the Aurora B Kinase. *Current*  
856 *Biology* 21, 1158–1165.
- 857 Sansregret, L., Patterson, J.O., Dewhurst, S., López-García, C., Koch, A., McGranahan, N., Chao,  
858 W.C.H., Barry, D.J., Rowan, A., Instrell, R., et al. (2017). APC/C Dysfunction Limits Excessive Cancer  
859 Chromosomal Instability. *Cancer Discovery* 7, 218–233.
- 860 Sheltzer, J.M., Blank, H.M., Pfau, S.J., Tange, Y., George, B.M., Humpton, T.J., Brito, I.L., Hiraoka, Y.,  
861 Niwa, O., and Amon, A. (2011). Aneuploidy Drives Genomic Instability in Yeast. *Science* 333, 1026–  
862 1030.
- 863 Stingele, S., Stoehr, G., Peplowska, K., Cox, J., Mann, M., and Storchova, Z. (2012). Global analysis of  
864 genome, transcriptome and proteome reveals the response to aneuploidy in human cells. *Molecular*  
865 *Systems Biology* 8, 608.
- 866 Taapken, S.M., Nisler, B.S., Newton, M.A., Sampsel-Barron, T.L., Leonhard, K.A., McIntire, E.M., and  
867 Montgomery, K.D. (2011). Karyotypic abnormalities in human induced pluripotent stem cells and  
868 embryonic stem cells. *Nature Biotechnology* 29, 313.
- 869 Thompson, S.L., and Compton, D.A. (2008). Examining the link between chromosomal instability and  
870 aneuploidy in human cells. *The Journal of Cell Biology* 180, 665–672.
- 871 Thompson, S.L., and Compton, D.A. (2010). Proliferation of aneuploid human cells is limited by a p53-  
872 dependent mechanism. *The Journal of Cell Biology* 188, 369–381.
- 873 Thompson, S.L., Bakhoun, S.F., and Compton, D.A. (2010). Mechanisms of Chromosomal Instability.  
874 *Current Biology* 20, R285–R295.
- 875 Thomson, J.A., Itskovitz-Eldor, J., Shapiro, S.S., Waknitz, M.A., Swiergiel, J.J., Marshall, V.S., and  
876 Jones, J.M. (1998). Embryonic Stem Cell Lines Derived from Human Blastocysts. *Science* 282, 1145–  
877 1147.

- 878 Vanneste, E., Voet, T., Caignec, C., Ampe, M., Konings, P., Melotte, C., Debrock, S., Amyere, M.,  
879 Vikkula, M., Schuit, F., et al. (2009). Chromosome instability is common in human cleavage-stage  
880 embryos. *Nature Medicine* *15*, nm.1924.
- 881 Vázquez-Diez, C., Paim, L.M.G.M., and FitzHarris, G. (2019). Cell-Size-Independent Spindle  
882 Checkpoint Failure Underlies Chromosome Segregation Error in Mouse Embryos. *Current Biology : CB*.
- 883 Warren, J.D., Orr, B., and Compton, D.A. (2020). A comparative analysis of methods to measure  
884 kinetochore-microtubule attachment stability. *Methods Cell Biol* *158*, 91–116.
- 885 Wei, Y., Multi, S., Yang, C.-R., Ma, J., Zhang, Q.-H., Wang, Z.-B., Li, M., Wei, L., Ge, Z.-J., Zhang, C.-  
886 H., et al. (2011). Spindle Assembly Checkpoint Regulates Mitotic Cell Cycle Progression during  
887 Preimplantation Embryo Development. *PLoS ONE* *6*, e21557.
- 888 Yang, M., Rito, T., Metzger, J., Naftaly, J., Soman, R., Hu, J., Albertini, D.F., Barad, D.H., Brivanlou,  
889 A.H., and Gleicher, N. (2021). Depletion of aneuploid cells in human embryos and gastruloids. *Nat Cell*  
890 *Biol* *23*, 314–321.
- 891 Zeng, X., Sigoillot, F., Gaur, S., Choi, S., Pfaff, K.L., Oh, D.-C.C., Hathaway, N., Dimova, N., Cuny,  
892 G.D., and King, R.W. (2010). Pharmacologic inhibition of the anaphase-promoting complex induces a  
893 spindle checkpoint-dependent mitotic arrest in the absence of spindle damage. *Cancer Cell* *18*, 382–395.
- 894 Zhang, J., Hirst, A.J., Duan, F., Qiu, H., Huang, R., Ji, Y., Bai, L., Zhang, F., Robinson, D., Jones, M., et  
895 al. (2019). Anti-apoptotic Mutations Desensitize Human Pluripotent Stem Cells to Mitotic Stress and  
896 Enable Aneuploid Cell Survival. *Stem Cell Reports*.
- 897 Zhao, Y., Carter, R., Natarajan, S., Varn, F.S., Compton, D.A., Gawad, C., Cheng, C., and Godek, K.M.  
898 (2019). Single-cell RNA sequencing reveals the impact of chromosomal instability on glioblastoma  
899 cancer stem cells. *BMC Medical Genomics* *12*, 79.

900

901 **Figure Legends:**

902 **Figure 1. Mitotic error rates are elevated in hPSCs compared to somatic cells. (A)**

903 Representative images of anaphase errors including a lagging chromosome with a centromere

904 (white arrow), chromosome bridge, acentric DNA fragment lacking a centromere (box),

905 unaligned chromosome with a centromere (yellow arrowhead) and multipolar anaphase in H1

906 hESCs. Shown is DNA (cyan), centromeres (magenta) and microtubules (yellow). Scale bars: 5

907  $\mu\text{m}$ . **(B)** Percentage of anaphase errors in primary somatic BJ fibroblasts and H1 and H9 hESCs

908 plated as single cells on Laminin-521.  $n = 317$  (BJ fibroblasts),  $251$  (H1 hESCs), and  $283$  (H9

909 hESCs) anaphases from three independent experiments; \* $p < 0.05$ , \*\* $p < 0.01$ , \*\*\*\* $p < 0.0001$

910 using a two-tailed Fisher's exact test. **(C)** Representative images of chromosome microtubule  
911 attachments in metaphase and anaphase H1 hESCs. Shown is DNA (cyan), microtubules  
912 (yellow) and centromeres (magenta). In the metaphase cell, boxes are pairs of centromeres with  
913 a bioriented attachment (dashed) or a merotelic attachment (solid, white arrow). The anaphase  
914 cell shows a lagging chromosome with a merotelic attachment (white arrow). Insets are  
915 magnified views. Scale bars: 5  $\mu\text{m}$  (main) and 1  $\mu\text{m}$  (insets). **(D)** Selected panels from time-  
916 lapse live-cell fluorescence imaging of H1 H2B-GFP hESCs showing a normal anaphase and  
917 erroneous anaphases with a lagging chromosome (white arrow) or chromosome bridge (yellow  
918 arrow). Scale bar: 10  $\mu\text{m}$ . **(E)** Percentage of anaphase errors in somatic RPE-1 H2B-GFP, H1  
919 H2B-GFP hESCs plated as single cells on Laminin-521 or as aggregates on Matrigel and AICS-  
920 061 hiPSCs.  $n = 46$  anaphases in RPE-1 and  $n = 111$  (H1 on Laminin-521), 121 (H1 on  
921 Matrigel), and 258 (AICS-061) anaphases in hPSCs from at least three independent  
922 experiments;  $*p < 0.05$  using a two-tailed Fisher's exact test. See also Figure S1.

923

924 **Figure 2. Prolonging mitotic duration decreases mitotic error rates in hPSCs.** **(A)** Model  
925 illustrating the relationship between mitotic errors and mitotic duration. Early in mitosis improper  
926 chromosome microtubule attachments are prevalent due to the stochastic interaction of  
927 microtubules with chromosomes, but errors decline as mitosis progresses and improper  
928 attachments are converted to correct ones. Prolonging mitosis using the small molecule  
929 proTAME increases the amount of time for microtubule error correction reducing the frequency  
930 of mitotic errors. **(B)** Selected panels from time-lapse live-cell fluorescence imaging of H1 H2B-  
931 GFP hESCs that were treated with DMSO or increasing concentrations of proTAME (yellow  
932 arrowheads indicate daughter nuclei). Scale bar: 10  $\mu\text{m}$ . **(C, D)** Mitotic duration **(C)** and  
933 percentage of lagging chromosomes or chromosome bridges **(D)** in H1 H2B-GFP hESCs  
934 treated with DMSO or increasing concentrations of proTAME.  $n = 275$  (DMSO), 247 (3  $\mu\text{M}$

935 proTAME), 250 (6  $\mu$ M proTAME), and 257 (20  $\mu$ M proTAME) anaphases from six independent  
936 experiments; NEB: nuclear envelope breakdown; AO: anaphase onset; mean  $\pm$  SD and \*\*\*\*p <  
937 0.0001 using a one-way ANOVA and Dunnett's multiple comparisons test (C); n.s. p > 0.05, \*p <  
938 0.05, \*\*p < 0.01, \*\*\*p < 0.001 using a two-tailed Fisher's exact test (C). See also Figure S2.

939

940 **Figure 3. Decreasing microtubule attachment stability reduces mitotic errors in hPSCs.**

941 (A) Model illustrating the relationship between mitotic errors and chromosome microtubule  
942 attachment stability. Higher microtubule attachment stability decreases the correction rate of  
943 improper attachments while lowering microtubule stability using the small molecule UMK57  
944 increases the correction rate of improper attachments reducing mitotic errors. (B) Percentage of  
945 lagging chromosomes and chromosome bridges in H1 and H9 hESCs and U2OS cancer cells  
946 after treatment with DMSO, UMK57 or UMK95 an inactive analog of UMK57 for 45 mins. n =  
947 431 (DMSO), 390 (1  $\mu$ M UMK57), 391 (2  $\mu$ M UMK57), and 410 (2  $\mu$ M UMK95) anaphases in H1  
948 hESCs. n = 405 (DMSO), 385 (1  $\mu$ M UMK57), 367 (2  $\mu$ M UMK57), and 393 (2  $\mu$ M UMK95)  
949 anaphases in H9 hESCs. n = 199 (DMSO), 242 (0.1  $\mu$ M UMK57), and 243 (0.1  $\mu$ M UMK95)  
950 anaphases in U2OS from three independent experiments; n.s. p > 0.05, \*p < 0.05, \*\*p < 0.01,  
951 \*\*\*\*p < 0.0001 using a two-tailed Fisher's exact test. (C, D) Percentage of lagging chromosomes  
952 and chromosome bridges from time-lapse live-cell fluorescence imaging of H1 H2B-GFP hESCs  
953 (C) or AICS-061 hiPSCs (D) treated with DMSO, UMK57 or UMK95 for 12 hrs. n = 205 (H1,  
954 DMSO), 278 (H1, 2  $\mu$ M UMK57), 187 (H1, 2  $\mu$ M UMK95), 158 (AICS-061, DMSO), 209 (AICS-  
955 061, 2  $\mu$ M UMK57), and 177 (AICS-061, 2  $\mu$ M UMK95) anaphases from three independent  
956 experiments; n.s. p > 0.05, \*p < 0.05, \*\*p < 0.01 using a two-tailed Fisher's exact test. See also  
957 Figure S3.

958

959 **Figure 4. Developmental potential influences mitotic error rates.** (A) Model illustrating the  
960 correlation between mitotic errors and developmental potential. As developmental potential  
961 decreases mitotic errors decrease, and conversely as developmental potential increases mitotic  
962 errors increase. (B) Percentage of lagging chromosomes and chromosome bridges in isogenic  
963 somatic WTC fibroblasts, WTC-11 hiPSCs and AICS-061 hiPSCs. n = 268 (WTC fibroblasts),  
964 421 (WTC-11 hiPSCs), and 438 (AICS-061 hiPSCs) anaphases from three independent  
965 experiments; \*\*\*p < 0.001, \*\*\*\*p < 0.0001 using a two-tailed Fisher's exact test. (C) Percentage  
966 of lagging chromosomes and chromosome bridges in H1 and H9 hESCs after 4 day treatment  
967 with DMSO or 1  $\mu$ M all-*trans* retinoic acid (RA) to induce undirected differentiation. n = 454 (H1,  
968 DMSO), 358 (H1, 1  $\mu$ M RA), 398 (H9, DMSO), and 356 (H9, 1  $\mu$ M RA) anaphases from three  
969 independent experiments; \*p < 0.05, \*\*\*p < 0.001, \*\*\*\*p < 0.0001 using a two-tailed Fisher's  
970 exact test. See also Figures S4 and S5.

971  
972 **Figure 5. Models for how mitotic errors contribute to culture adaptation in hPSCs and**  
973 **aneuploidy during human development.** (A) We speculate that culture adaptation in hPSCs  
974 depends on lagging chromosome errors that lead to chromosome missegregations and the  
975 generation of aneuploid progeny. Most aneuploid hPSCs (orange) are at a growth disadvantage  
976 and are outcompeted by diploid hPSCs (blue) as chromosome missegregation is random with  
977 respect to which chromosome is missegregated. However, the persistent and high rate of  
978 lagging chromosome errors in hPSCs coupled with continued propagation in culture increases  
979 the probability that aneuploid hPSCs with stable chromosome abnormalities conferring a growth  
980 advantage over diploid hPSCs are selected for (purple hPSCs). (B) We propose that  
981 preimplantation totipotent and pluripotent embryonic cells exhibit a high rate of lagging  
982 chromosomes that cause chromosome segregation errors and the generation of aneuploid  
983 embryonic cells leading to mosaic embryos composed of mixed populations of diploid and

984 aneuploid embryonic cells. However, as development progresses, developmental potential  
985 decreases coinciding with a decline in the lagging chromosome rate that when coupled with a  
986 selective disadvantage for aneuploid (orange) compared to diploid (blue) embryonic cells  
987 explains how mosaic embryos can support normal human development.



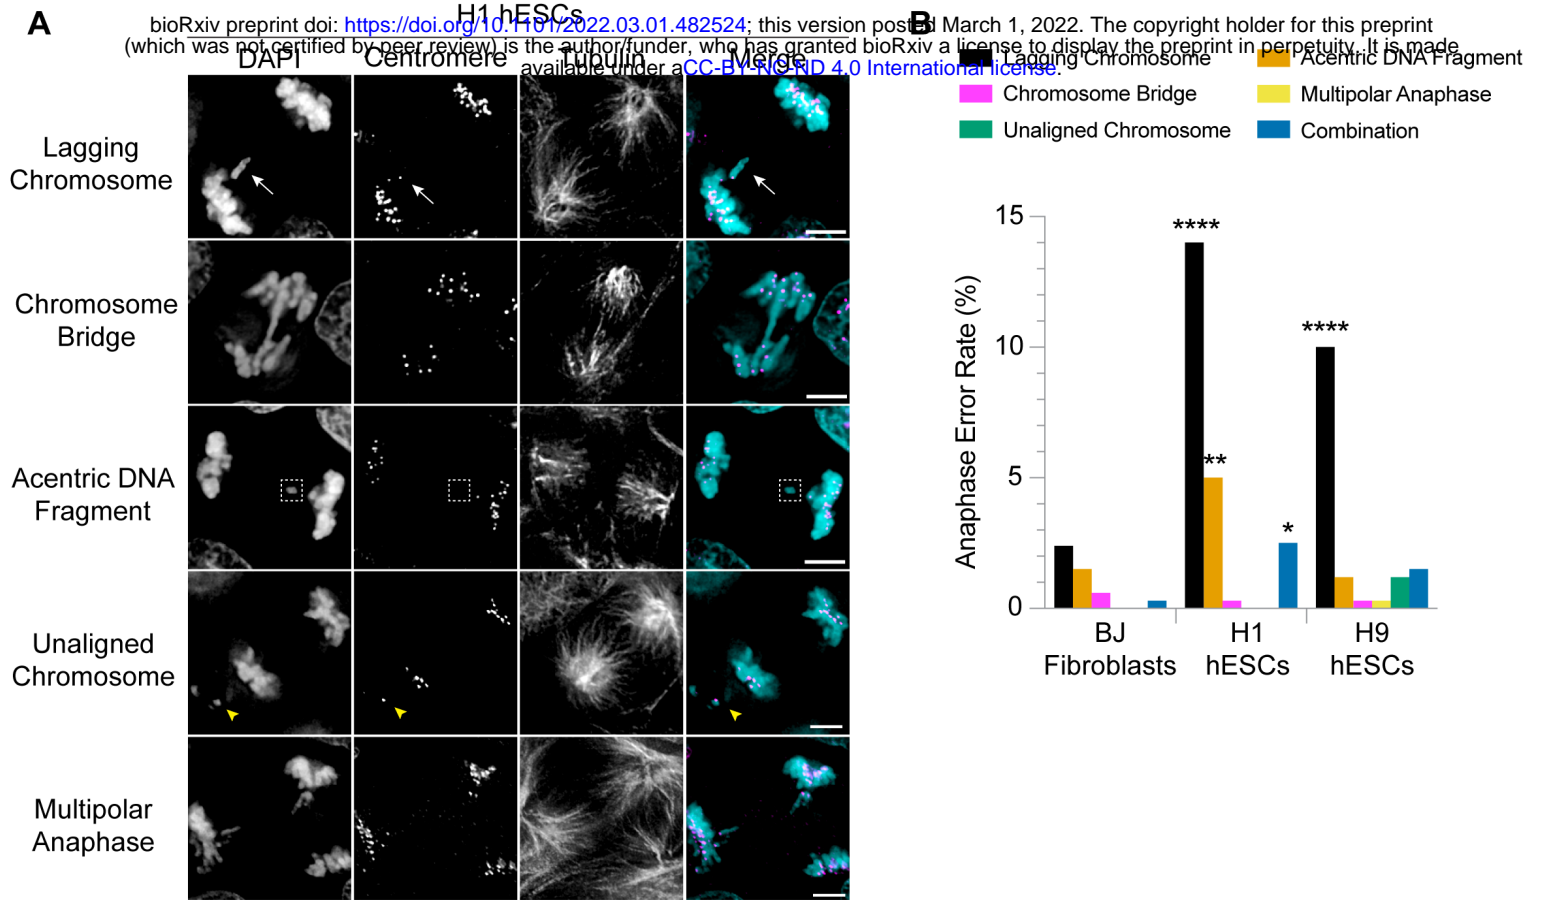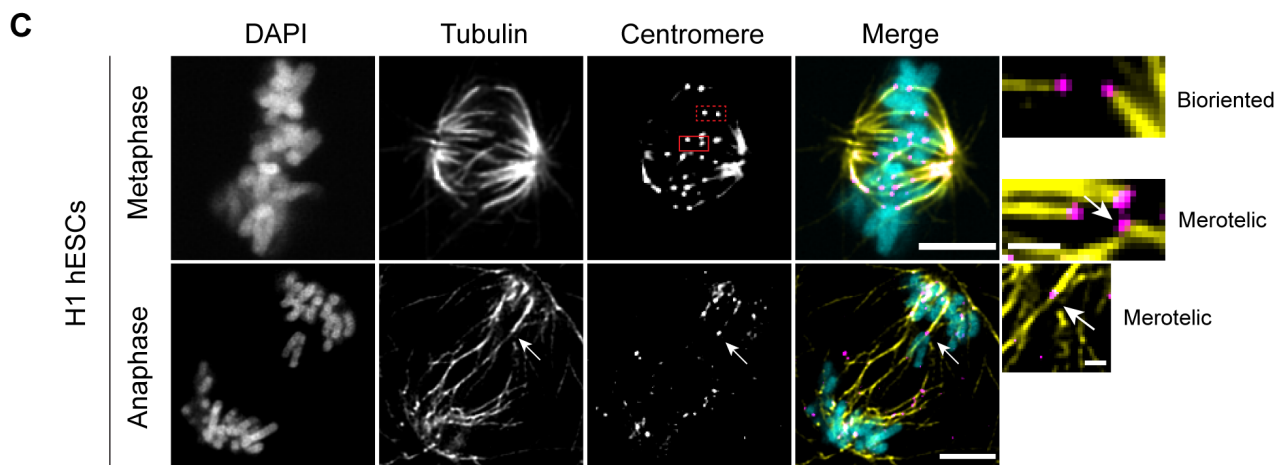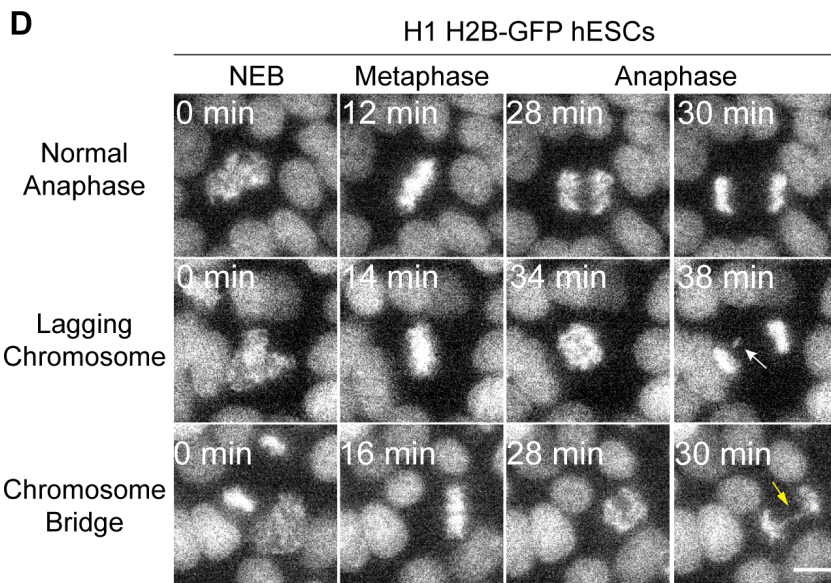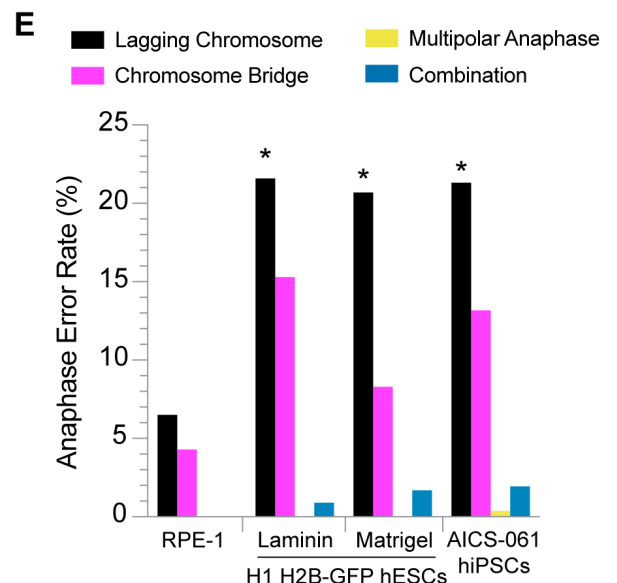

Figure 1

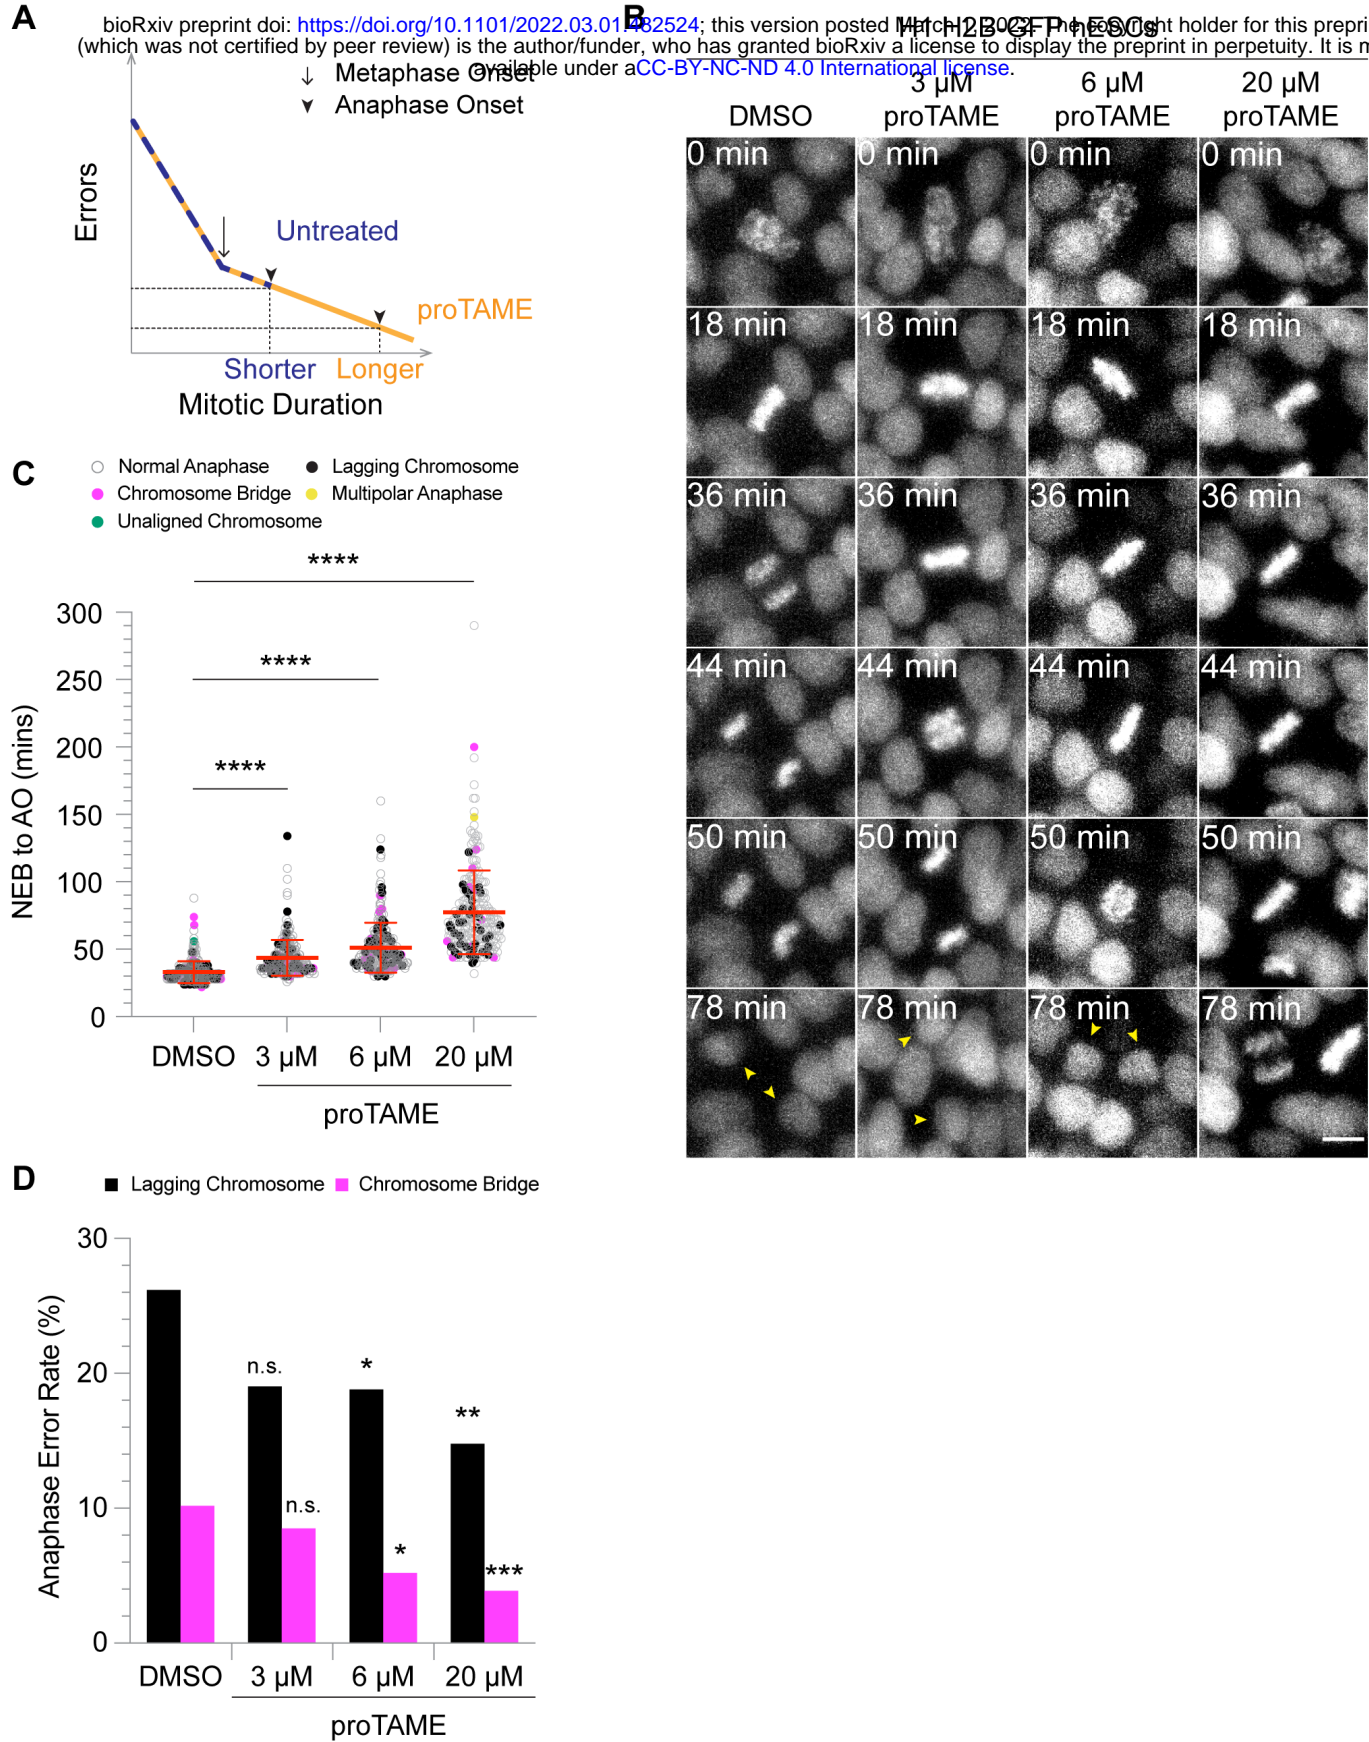

Figure 2



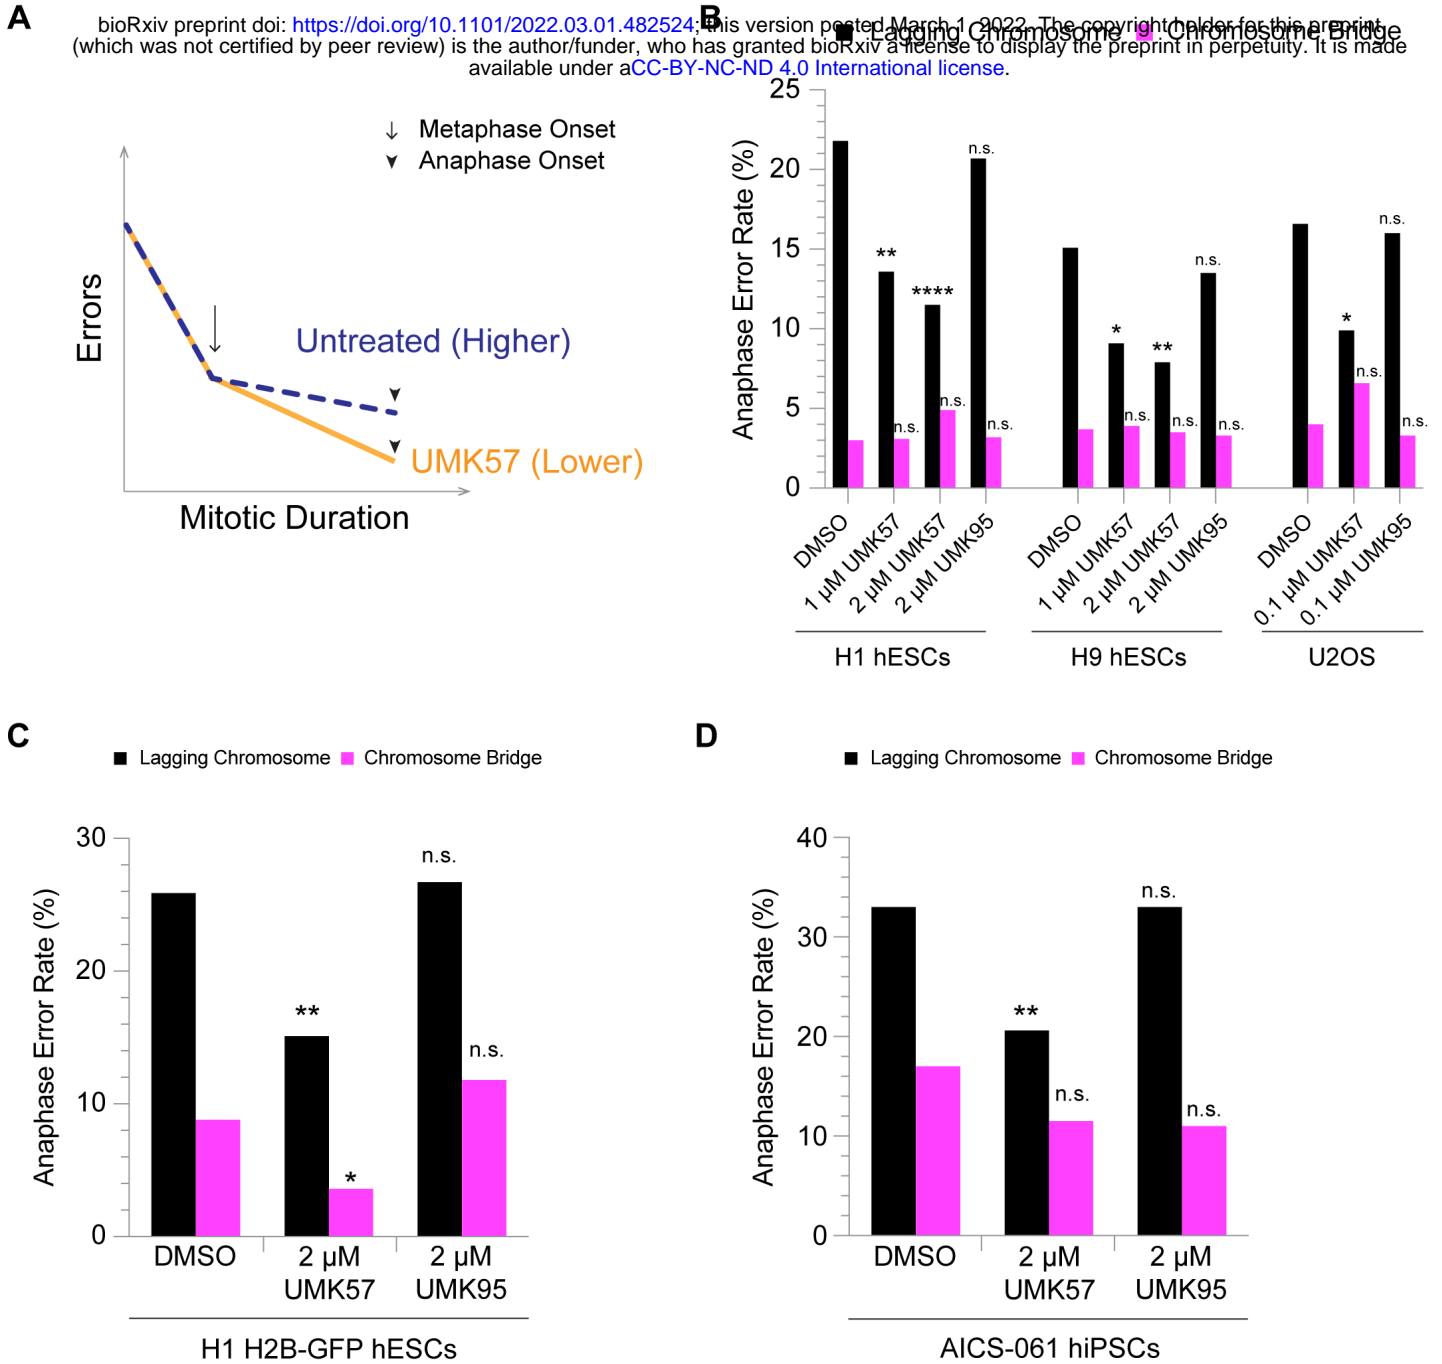

Figure 3

**A**

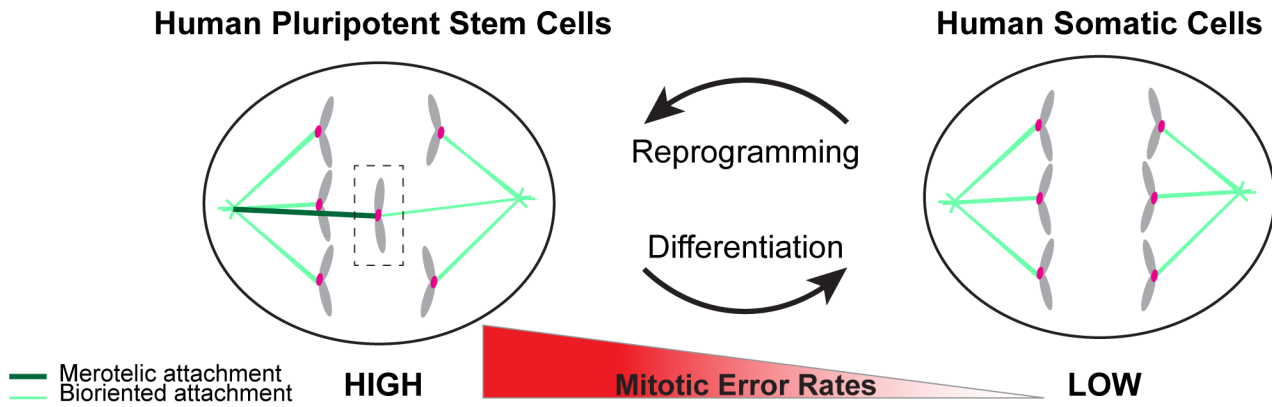

**B**

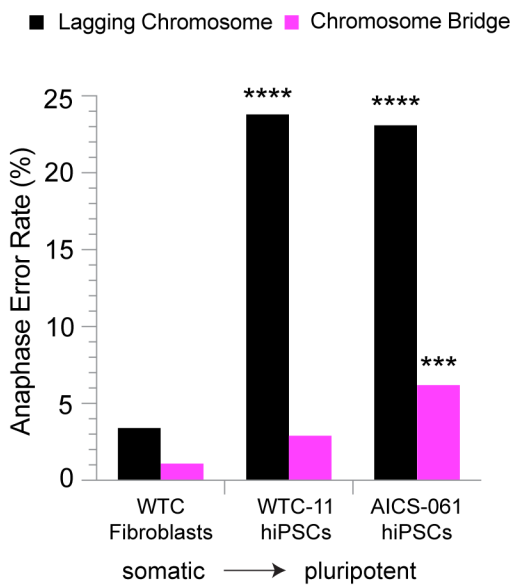

**C**

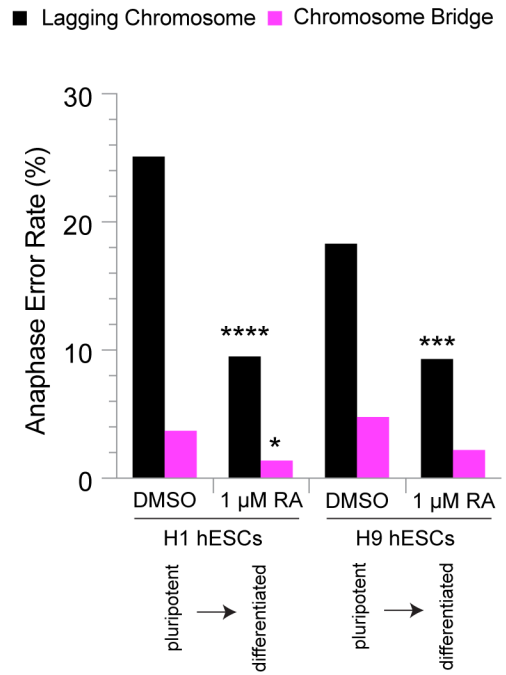

**Figure 4**

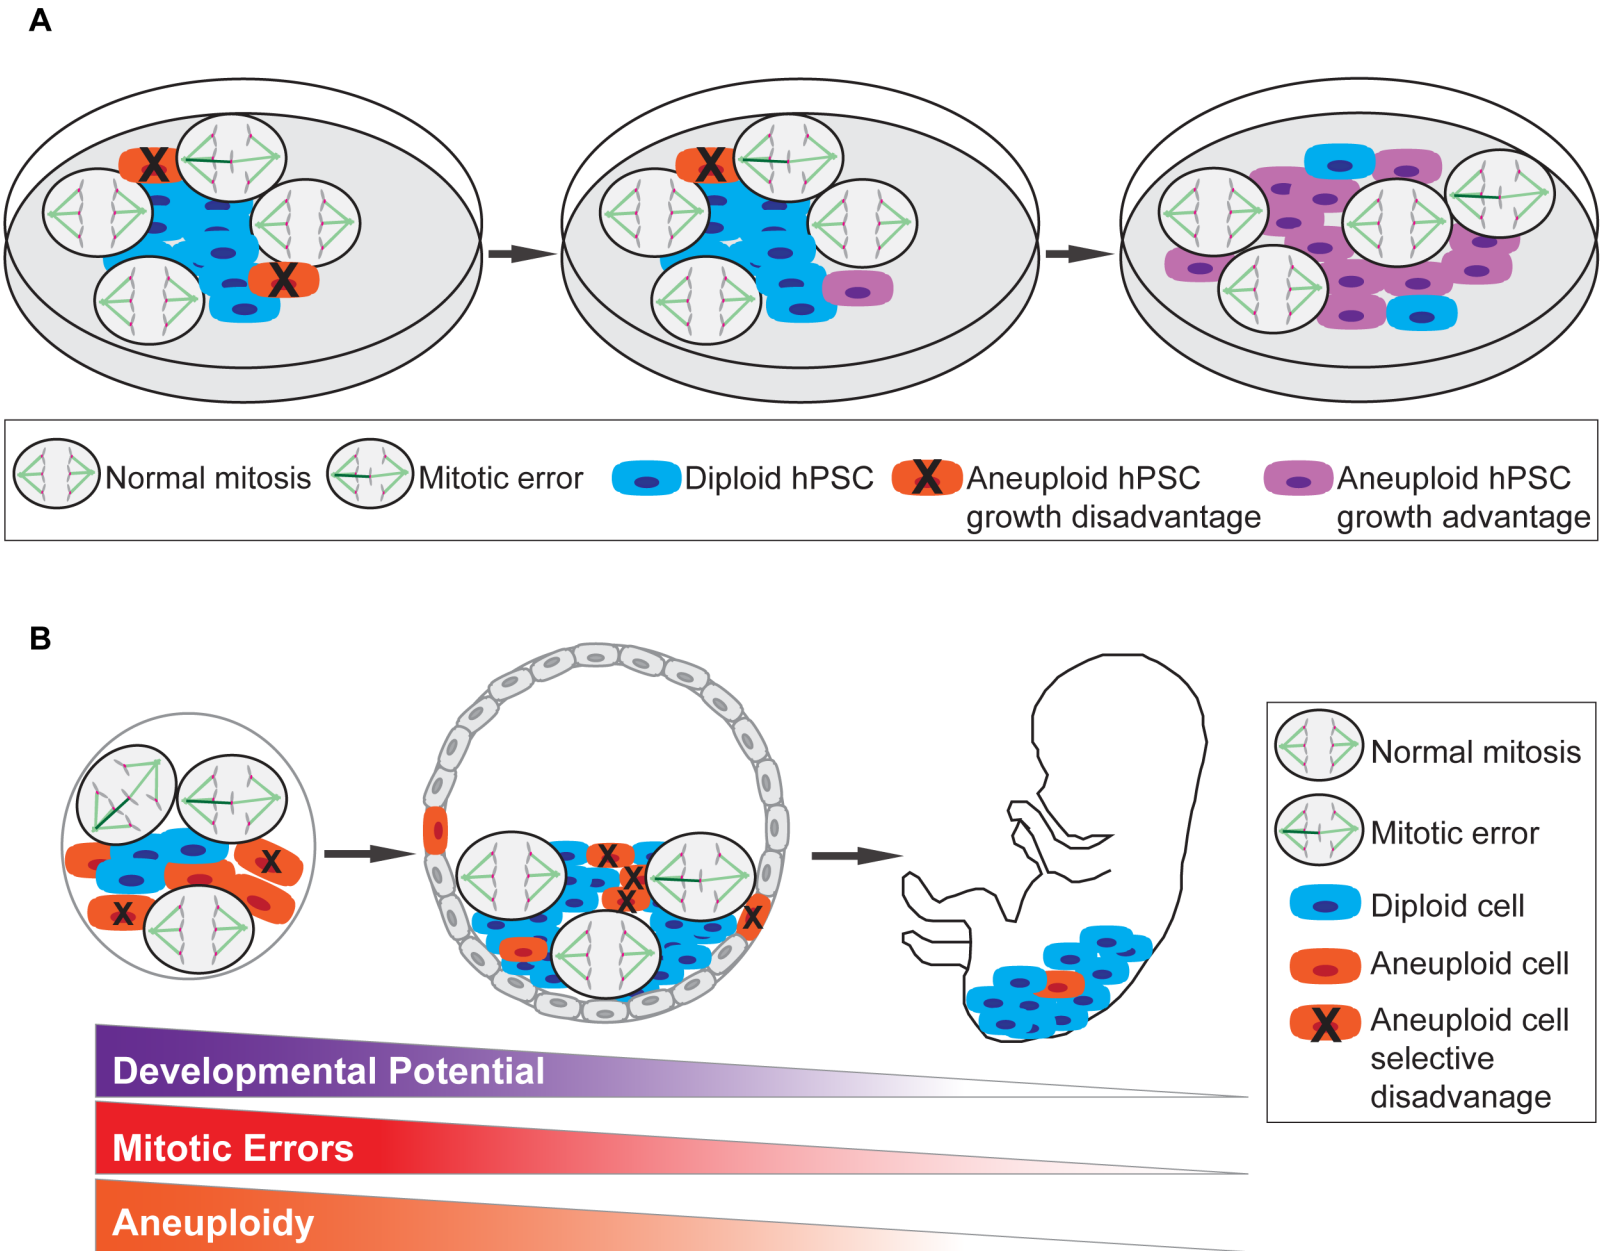

Figure 5
